# Supplementary material for: Aromaticity transfer in an annulated 1,4,2-diazaborole: facile access to C s symmetric 1,4,2,5-diazadiborinines
Source: Royal Society of Chemistry journal article supplement (doi:10.1039/d4cc02414a), 2024-01-01
Supplement: d4cc02414a1.pdf [file d4cc02414a1.pdf]

Supporting information for:

Aromaticity transfer in an annulated 1,4,2-diazaborole: Facile access to  
 $C_s$  symmetric 1,4,2,5-diazadiborinines

Vignesh Pattathil, Conor Prancevicius\*

## Table of Contents

|                                                 |     |
|-------------------------------------------------|-----|
| 1) Experimental Details .....                   | S2  |
| 2) Cyclic Voltammetry .....                     | S27 |
| 3) UV-Visible and Fluorescence spectra .....    | S28 |
| 4) Crystallographic Details .....               | S39 |
| 5) Density Functional Theory Calculations ..... | S33 |
| 6) Supplementary References .....               | S51 |

## 1.) Experimental Details

### General experimental considerations

All syntheses were carried out in a nitrogen or argon-filled glovebox or with standard Schlenk techniques<sup>1</sup> unless otherwise stated. Reagents were purchased from Sigma-Aldrich and used without further purification unless otherwise stated. N-mesityl-N'-(2-pyridyl)imidazolium bromide,<sup>2</sup> MesBBr<sub>2</sub>,<sup>3</sup> PhBCl<sub>2</sub>,<sup>3</sup> Na<sub>2</sub>[Fe(CO)<sub>4</sub>],<sup>4</sup> and 9-borabicyclo[3.3.1]nonane (9-BBN)<sup>5</sup> were synthesized according to literature procedures. All solvents were dried by passage through a Grubbs-style solvent purification system and stored over activated 4Å molecular sieves. All solution NMR spectra were acquired on a Varian Mercury Vx 400 MHz NMR spectrometer equipped with an ATB probe at 298 K (<sup>1</sup>H: 400.1 MHz, <sup>13</sup>C: 100.6 MHz, <sup>11</sup>B: 128.4 MHz, <sup>19</sup>F: 376.5 MHz). <sup>1</sup>H and <sup>13</sup>C spectra were referenced to residual solvent signals. NMR multiplicities were abbreviated as follows: s = singlet, d = doublet, t = triplet, m = multiplet, br.s = broad signal, dd = doublet of doublet, ddd = doublet of doublet of doublet, dt = doublet of triplet. UV-Vis spectra were acquired on a SHIMADZU UV-2550 spectrophotometer and fluorescence spectra were acquired on a PerkinElmer LS45 fluorimeter. Electrospray ionization (ESI) mass spectra were obtained using a high-resolution Agilent 6530 Quadrupole Time of Flight (QToF) mass spectrometer. Melting points were measured using Fisherbrand™ digital melting point apparatus.

### Synthesis of 1:

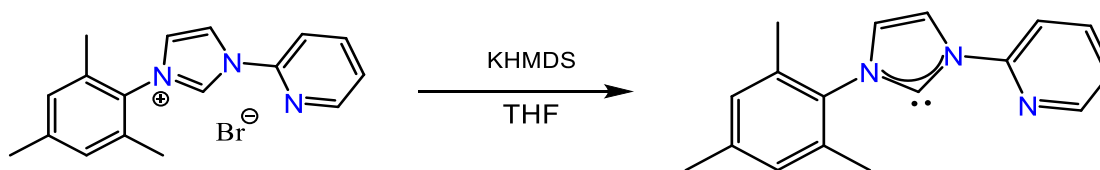

Potassium hexamethyldisilylamide (KHMDS) (5.80 g, 29.1 mmol) was added to a stirred suspension of N-mesityl-N'-(2-pyridyl)imidazolium bromide (10.0 g, 29.1 mmol) in 200 mL THF. After stirring for 2 hours at room temperature, the light brown suspension was filtered over celite through a glass frit and the solvent was removed under vacuum. The residue was extracted with

hexane (3x 80 mL), the extracts combined, filtered, and concentrated *in vacuo* causing the crystallization of pure carbene. All volatiles were removed under vacuum to obtain **1** as a golden brown solid (6.31 g, 83%). NMR data matched literature values.<sup>6</sup>

### Synthesis of **2**:

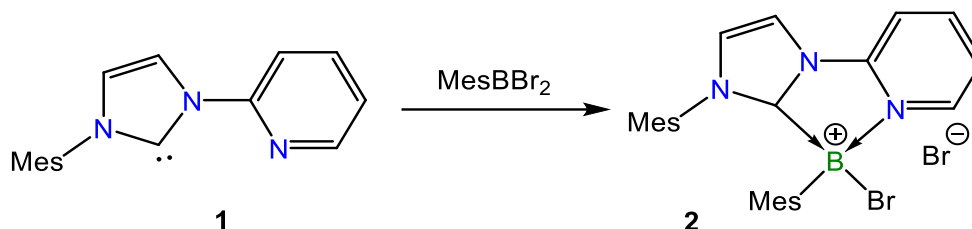

A solution of **1** (2.03 g, 7.71 mmol) in 60 mL hexane was added dropwise to a stirred solution of MesBBr<sub>2</sub> (3.35 g, 11.56 mmol) in 40 mL hexane. The precipitate formed was collected, washed with hexane (3x 10 mL), ether (2x 10 mL), and dried under vacuum to afford **2** as an off-white solid (4.01 g, 94%).

<sup>1</sup>H NMR (400.1 MHz, CDCl<sub>3</sub>): δ = 10.64 (d, 1H, <sup>3</sup>J = 1.8 Hz, CH<sub>Imidaz</sub>), 10.33 (d, 1H, <sup>3</sup>J = 8.0 Hz, CH<sub>Py</sub>), 8.69 (t, 1H, <sup>3</sup>J = 7.8 Hz, CH<sub>Py</sub>), 8.49 (d, 1H, <sup>3</sup>J = 5.6 Hz, CH<sub>Py</sub>), 7.82 (t, 1H, <sup>3</sup>J = 6.5 Hz, CH<sub>Py</sub>), 7.28 (d, 1H, <sup>3</sup>J = 1.8 Hz, CH<sub>Imidaz</sub>), 7.07 (s, 1H, CH<sub>Mes</sub>), 6.79 (s, 1H, CH<sub>Mes</sub>), 6.71 (s, 1H, CH<sub>Mes</sub>), 6.61 (s, 1H, CH<sub>Mes</sub>), 2.35 (s, 3H, CH<sub>3-Mes</sub>), 2.25 (s, 3H, CH<sub>3-Mes</sub>), 2.21 (s, 3H, CH<sub>3-Mes</sub>), 1.82 (s, 3H, CH<sub>3-Mes</sub>), 1.27 (s, 3H, CH<sub>3-Mes</sub>), 1.17 (s, 3H, CH<sub>3-Mes</sub>) ppm.

<sup>13</sup>C{<sup>1</sup>H} NMR (100.6 MHz, CDCl<sub>3</sub>): δ = 161.93 (NCN<sub>Imidaz</sub>), 148.17 (CH<sub>Py</sub>), 145.98 (CH<sub>Imidaz</sub>), 144.92 (*q*-Mes), 144.03 (CH<sub>Py</sub>), 141.64 (*q*-Mes), 139.89 (*q*-Mes), 138.51 (*q*-Mes), 134.71 (*q*-Mes), 134.41 (*q*-Mes), 131.13 (CH<sub>Mes</sub>), 130.63 (CH<sub>Mes</sub>), 130.09 (CH<sub>Mes</sub>), 129.94 (CH<sub>Mes</sub>), 129.42 (*q*-Mes), 127.87 (CH<sub>Imidaz</sub>), 125.88 (CH<sub>Py</sub>), 120.89 (*q*-Mes), 120.86 (*q*-Py), 117.71 (CH<sub>Py</sub>), 25.65 (CH<sub>3-Mes</sub>), 23.02 (CH<sub>3-Mes</sub>), 21.15 (CH<sub>3-Mes</sub>), 20.72 (CH<sub>3-Mes</sub>), 18.28 (CH<sub>3-Mes</sub>), 15.95 (CH<sub>3-Mes</sub>) ppm.

<sup>11</sup>B{<sup>1</sup>H} NMR (128.4 MHz, CDCl<sub>3</sub>): δ = 1.1 ppm.

HRMS (ESI): C<sub>26</sub>H<sub>28</sub>BBr<sub>2</sub>N<sub>3</sub> Calculated for [M-Br]<sup>+</sup> 474.1534, observed 474.1521

MP: 186 °C (decomp)

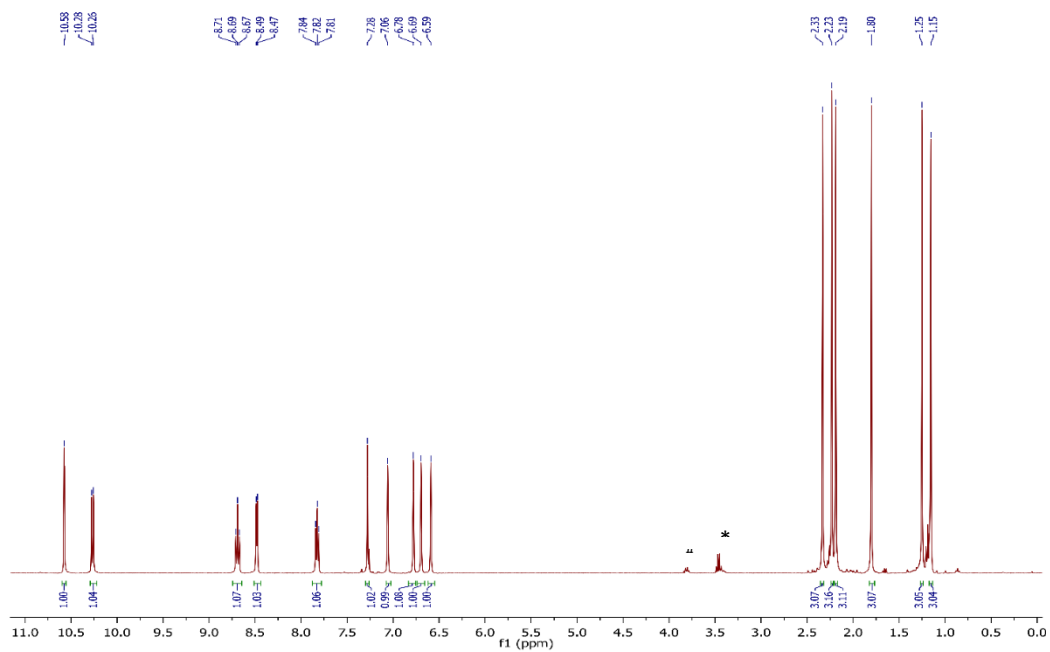

**Figure S1:**  $^1\text{H}$  NMR spectrum of **2** in  $\text{CDCl}_3$  (residual solvent: \*ether, #tetrahydrofuran)

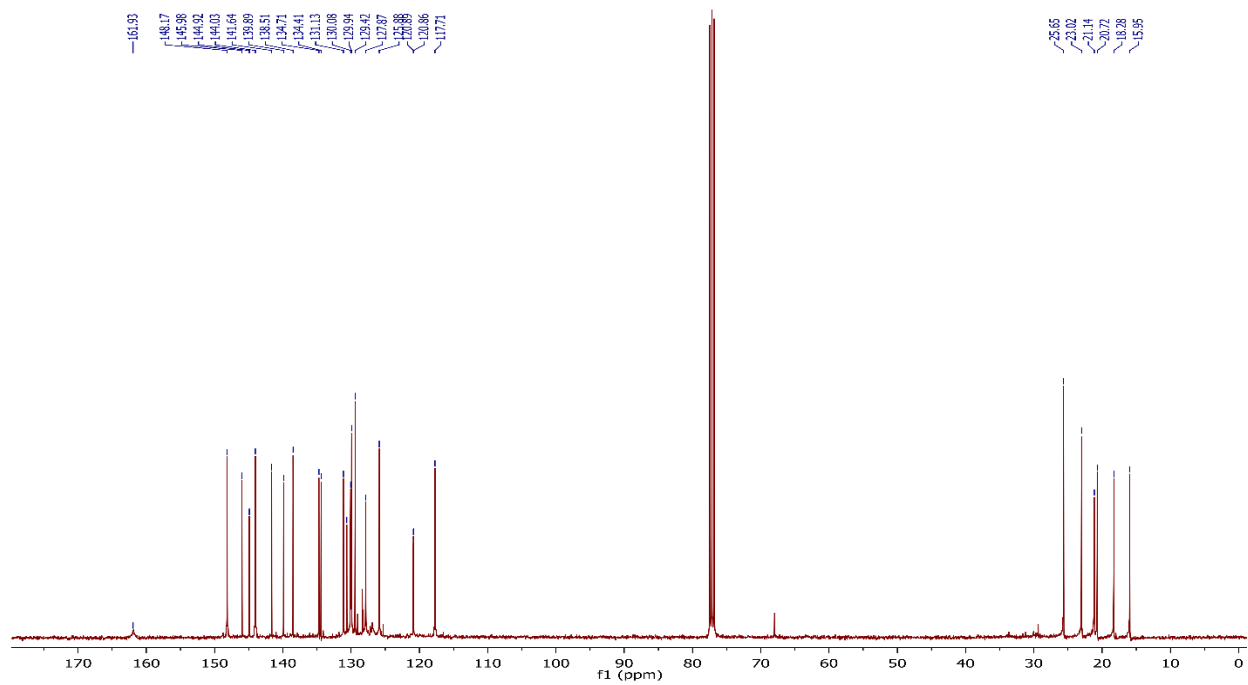

**Figure S2:**  $^{13}\text{C}\{^1\text{H}\}$  NMR spectrum of **2** in  $\text{CDCl}_3$

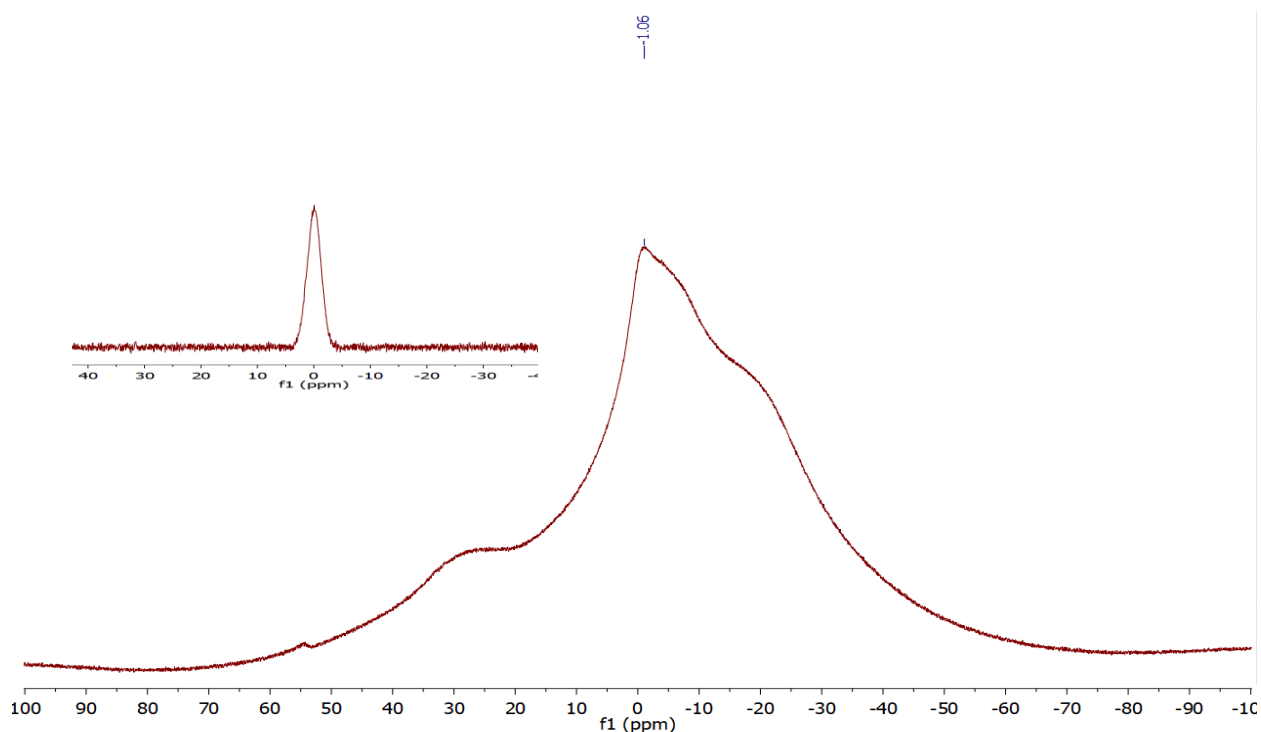

**Figure S3:**  $^{11}\text{B}\{^1\text{H}\}$  NMR spectrum of **2** in  $\text{CDCl}_3$ . Inset is the  $^{11}\text{B}\{^1\text{H}\}$  spectrum with glass peak subtracted. (\* is excess  $\text{MesBBr}_2$ )

### Synthesis of **3**:

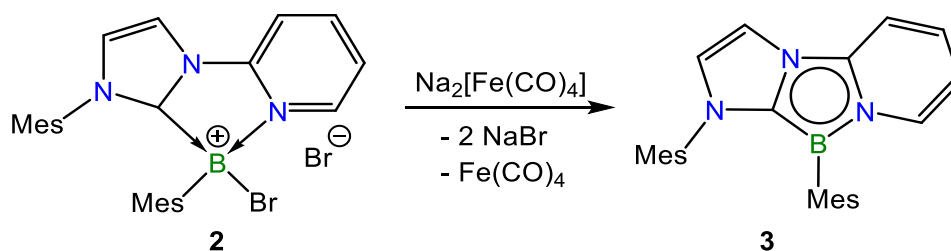

Solid **2** (1.02 g, 1.84 mmol) was slowly added to a stirred suspension of  $\text{Na}_2[\text{Fe}(\text{CO})_4]$  (0.87g, 4.06 mmol) in 60 mL THF at room temperature over the course of 15 minutes. The solution immediately became dark red and was allowed to stir for an additional 15 minutes. The solution was then filtered, the solvent removed, and the residue was extracted with 200 mL hexane. The solvent was removed, and the residue dried under vacuum to obtain **3** as a dark red solid (0.58 g, 80 %). Crystals suitable for single crystal X-ray diffraction were grown from hexane at  $-35^\circ\text{C}$ .

**$^1\text{H}$  NMR (400.1 MHz,  $\text{C}_6\text{D}_6$ ):**  $\delta$  = 7.56 (dt, 1H,  $^3J$  = 7.0 Hz,  $^4J$  = 1.0 Hz,  $\text{CH}_{\text{Py}}$ ), 6.94 (dt, 1H,  $^3J$  = 8.5 Hz,  $^4J$  = 1.0 Hz,  $\text{CH}_{\text{Py}}$ ), 6.85 (m, 3H,  $\text{CH}_{\text{Mes}}$  +  $\text{CH}_{\text{Imidaz}}$ ), 6.57 (s, 2H,  $\text{CH}_{\text{Mes}}$ ), 6.30 (m, 2H,  $\text{CH}_{\text{Py}}$  +  $\text{CH}_{\text{Imidaz}}$ ), 6.19 (m, 1H,  $\text{CH}_{\text{Py}}$ ), 2.24 (s, 6H, *o*- $\text{CH}_3$ -Mes), 2.14 (s, 3H, *p*- $\text{CH}_3$ -Mes), 2.01 (s, 6H, *o*- $\text{CH}_3$ -Mes), 1.93 (s, 3H, *p*- $\text{CH}_3$ -Mes) ppm.

**$^{13}\text{C}\{^1\text{H}\}$  NMR (100.6 MHz,  $\text{C}_6\text{D}_6$ ):**  $\delta$  = 142.43 (*q*-Mes), 137.46 (*q*-Mes), 136.38 (*q*-Mes), 136.22 (*q*-Mes), 135.42 (*q*-Mes), 129.29 ( $\text{CH}_{\text{Mes}}$ ), 127.94 ( $\text{CH}_{\text{Py}}$ ), 127.76 ( $\text{CH}_{\text{Mes}}$ ), 127.59 ( $\text{CH}_{\text{Imidaz}}$ ), 125.18 ( $\text{CH}_{\text{Imidaz}}$ ), 118.26 (*q*-NCN), 112.61 ( $\text{CH}_{\text{Py}}$ ), 109.79 ( $\text{CH}_{\text{Py}}$ ), 107.20 ( $\text{CH}_{\text{Py}}$ ), 102.92 (*q*-Py), 22.95 (*o*- $\text{CH}_3$ -Mes), 21.36 (*p*- $\text{CH}_3$ -Mes), 20.92 (*p*- $\text{CH}_3$ -Mes), 18.03 (*o*- $\text{CH}_3$ -Mes) ppm. Note: The signal for the carbene could not be identified due to broadening.

**$^{11}\text{B}\{^1\text{H}\}$  NMR (128.4 MHz,  $\text{C}_6\text{D}_6$ ):**  $\delta$  = 12.2 ppm.

**HRMS (ESI):**  $\text{C}_{26}\text{H}_{28}\text{BN}_3$  Calculated for  $[\text{M}+\text{H}]^+$  394.2450, observed 394.2479

**MP:** 120 °C (decomp)

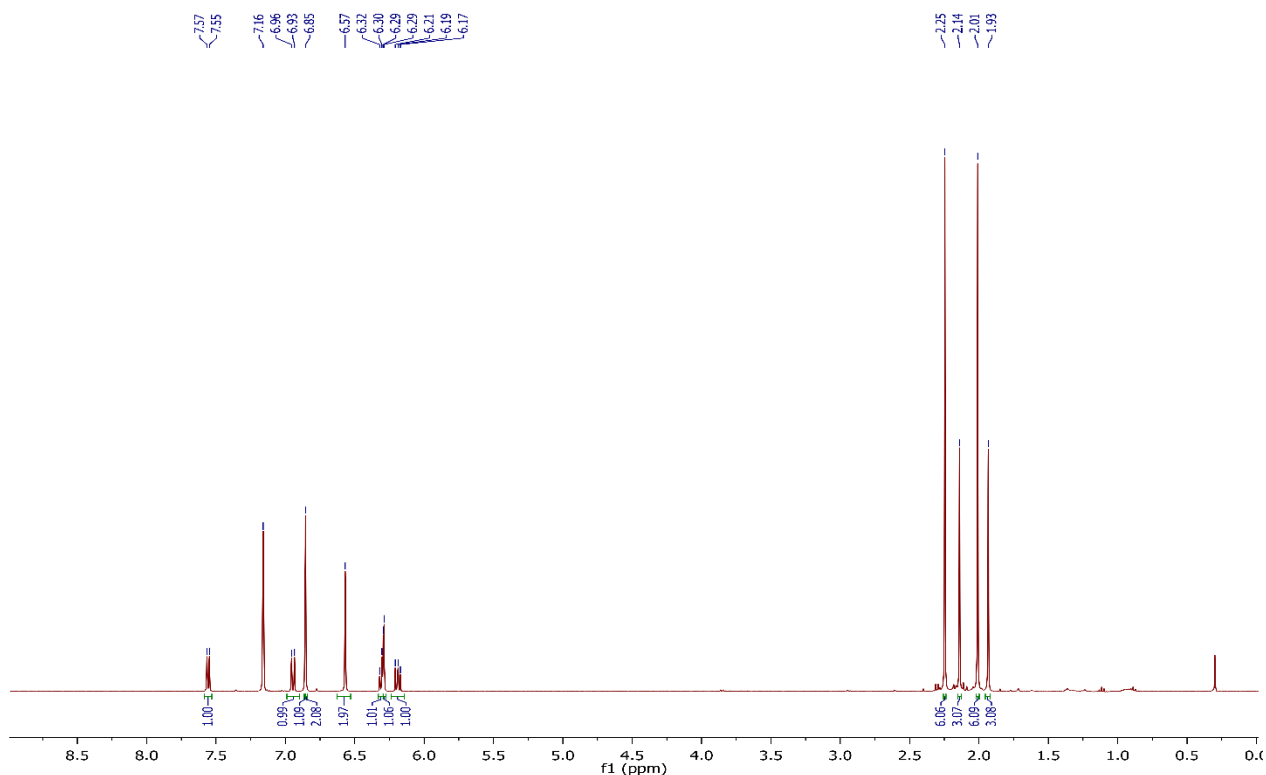

**Figure S4:**  $^1\text{H}$  NMR spectrum of **3** in  $\text{C}_6\text{D}_6$

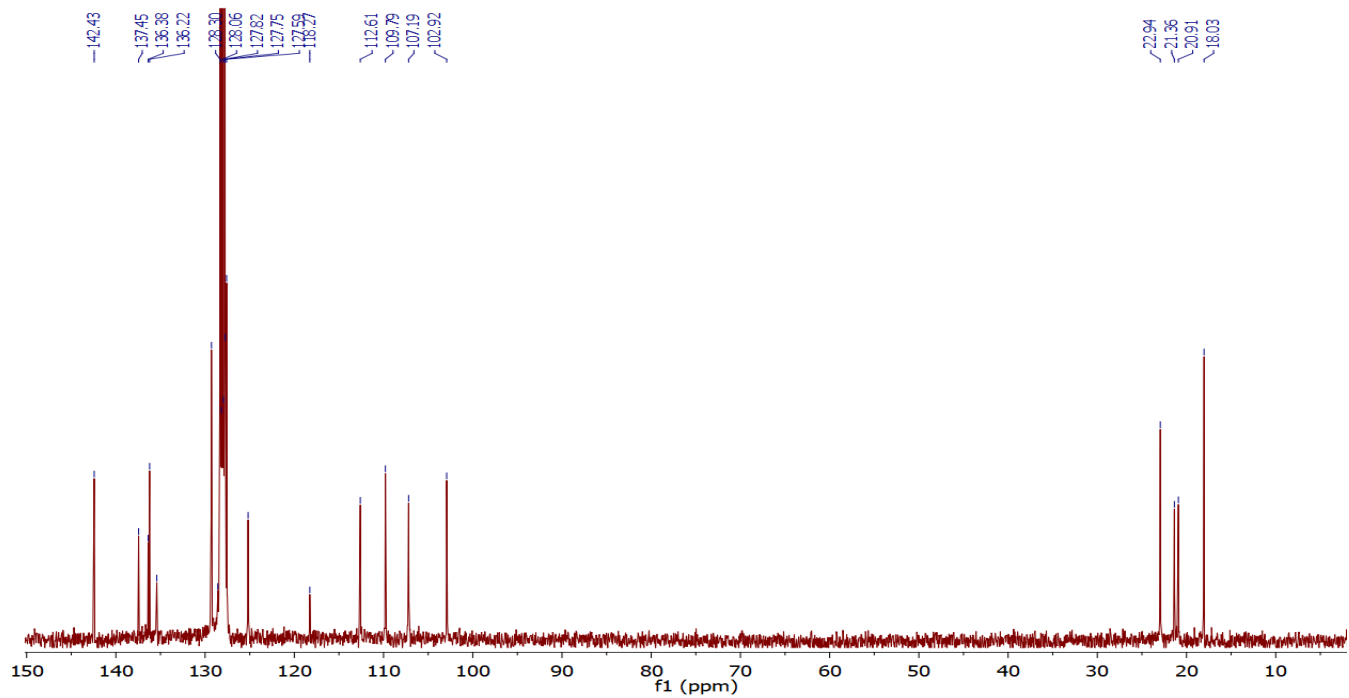

**Figure S5:**  $^{13}\text{C}\{^1\text{H}\}$  NMR spectrum of **3** in  $\text{C}_6\text{D}_6$

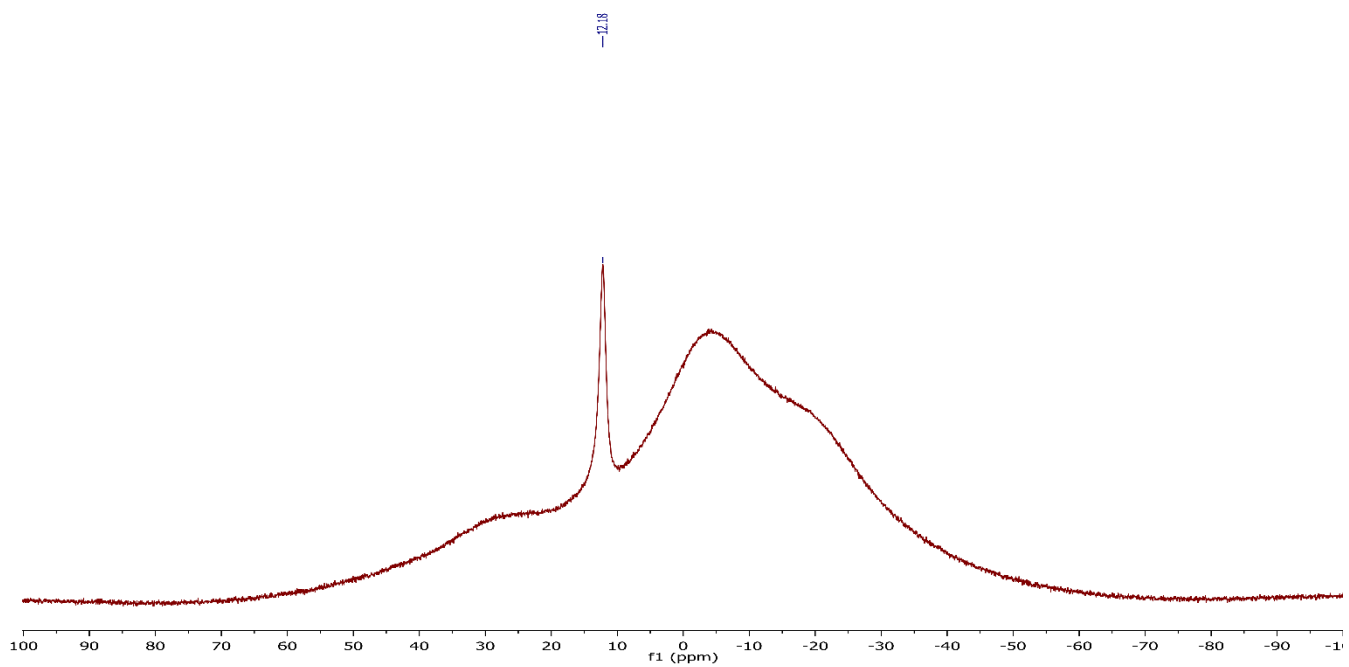

**Figure S6:**  $^{11}\text{B}\{^1\text{H}\}$  NMR spectrum of **3** in  $\text{C}_6\text{D}_6$

## Synthesis of 4:

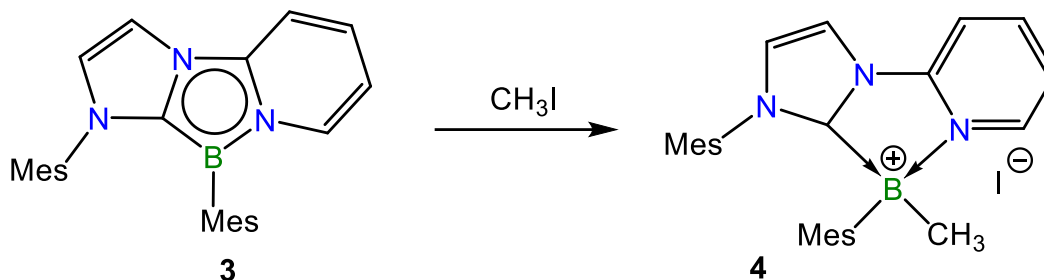

A solution of **3** (100 mg, 0.25 mmol) in benzene (5 ml) was combined with iodomethane (40 mg, 0.28 mmol) and stirred at 60°C for 6 hours, resulting in the formation of a blue solution and the formation of a precipitate. The precipitate was collected by filtration, washed with benzene (3 x 5 mL), and dried under vacuum affording **4** as a white solid (88 mg, 65%). Crystals suitable for single crystal X-ray diffraction were grown from a DCM solution layered with ether.

**$^1\text{H}$  NMR (400.1 MHz,  $\text{CDCl}_3$ ):**  $\delta$  = 10.06 (d, 1H,  $^3J$  = 2.0 Hz,  $\text{CH}_{\text{Imidaz}}$ ), 9.92 (dt, 1H,  $^3J$  = 8.4 Hz,  $^4J$  = 0.8 Hz,  $\text{CH}_{\text{Py}}$ ), 8.63 (ddd, 1H,  $^3J$  = 8.4 Hz, 7.6 Hz,  $^4J$  = 1.5 Hz,  $\text{CH}_{\text{Py}}$ ), 8.23 (ddd, 1H,  $^3J$  = 5.8 Hz,  $^4J$  = 1.5 Hz,  $^5J$  = 0.8 Hz,  $\text{CH}_{\text{Py}}$ ), 7.79 (ddd, 1H,  $^3J$  = 7.6 Hz, 5.8 Hz,  $^4J$  = 0.8 Hz,  $\text{CH}_{\text{Py}}$ ), 7.27 (d, 1H,  $^3J$  = 1.8 Hz,  $\text{CH}_{\text{Imidaz}}$ ), 7.05 (s, 1H,  $\text{CH}_{\text{Mes}}$ ), 6.79 (s, 1H,  $\text{CH}_{\text{Mes}}$ ), 6.66 (s, 1H,  $\text{CH}_{\text{Mes}}$ ), 6.57 (s, 1H,  $\text{CH}_{\text{Mes}}$ ), 2.34 (s, 3H,  $\text{CH}_3\text{-Mes}$ ), 2.18 (s, 3H,  $\text{CH}_3\text{-Mes}$ ), 2.08 (s, 3H,  $\text{CH}_3\text{-Mes}$ ), 1.74 (s, 3H,  $\text{CH}_3\text{-Mes}$ ), 1.30 (s, 3H,  $\text{CH}_3\text{-Mes}$ ), 1.08 (s, 3H,  $\text{CH}_3\text{-Mes}$ ), 0.39 (s, 3H, B- $\text{CH}_3$ ) ppm.

**$^{13}\text{C}\{^1\text{H}\}$  NMR (100.6 MHz,  $\text{CDCl}_3$ ):** 169.73 ( $\text{NCN}_{\text{Imidaz}}$ ), 144.73 ( $\text{CH}_{\text{Py}}$ ), 144.52 (*q*-Mes), 143.98 (*q*-Mes), 141.48 (*q*-Py), 140.15 (*q*-Mes), 136.10 (*q*-Mes), 133.82 (*q*-Mes), 133.15 ( $\text{CH}_{\text{Py}}$ ), 129.94 (*q*-Mes), 129.67 ( $\text{CH}_{\text{Mes}}$ ), 128.98 ( $\text{CH}_{\text{Mes}}$ ), 128.55 ( $\text{CH}_{\text{Mes}}$ ), 128.46 ( $\text{CH}_{\text{Mes}}$ ), 127.30 (*q*-Mes), 126.08 ( $\text{CH}_{\text{Imidaz}}$ ), 123.89 ( $\text{CH}_{\text{Py}}$ ), 118.80 ( $\text{CH}_{\text{Imidaz}}$ ), 116.15 ( $\text{CH}_{\text{Py}}$ ), 23.60 ( $\text{CH}_3\text{-Mes}$ ), 21.54 ( $\text{CH}_3\text{-Mes}$ ), 20.07 ( $\text{CH}_3\text{-Mes}$ ), 19.59 ( $\text{CH}_3\text{-Mes}$ ), 16.67 ( $\text{CH}_3\text{-Mes}$ ), 14.96 ( $\text{CH}_3\text{-Mes}$ ), 10.30 (B- $\text{CH}_3$ ) ppm.

**$^{11}\text{B}\{^1\text{H}\}$  NMR (128.4 MHz,  $\text{CDCl}_3$ ):**  $\delta$  -0.2 ppm.

**HRMS (ESI):**  $\text{C}_{27}\text{H}_{31}\text{BN}_3\text{I}$  Calculated for  $[\text{2M}]^+$  1070.3302, observed 1070.3334

**MP:** 192 °C (decomp)



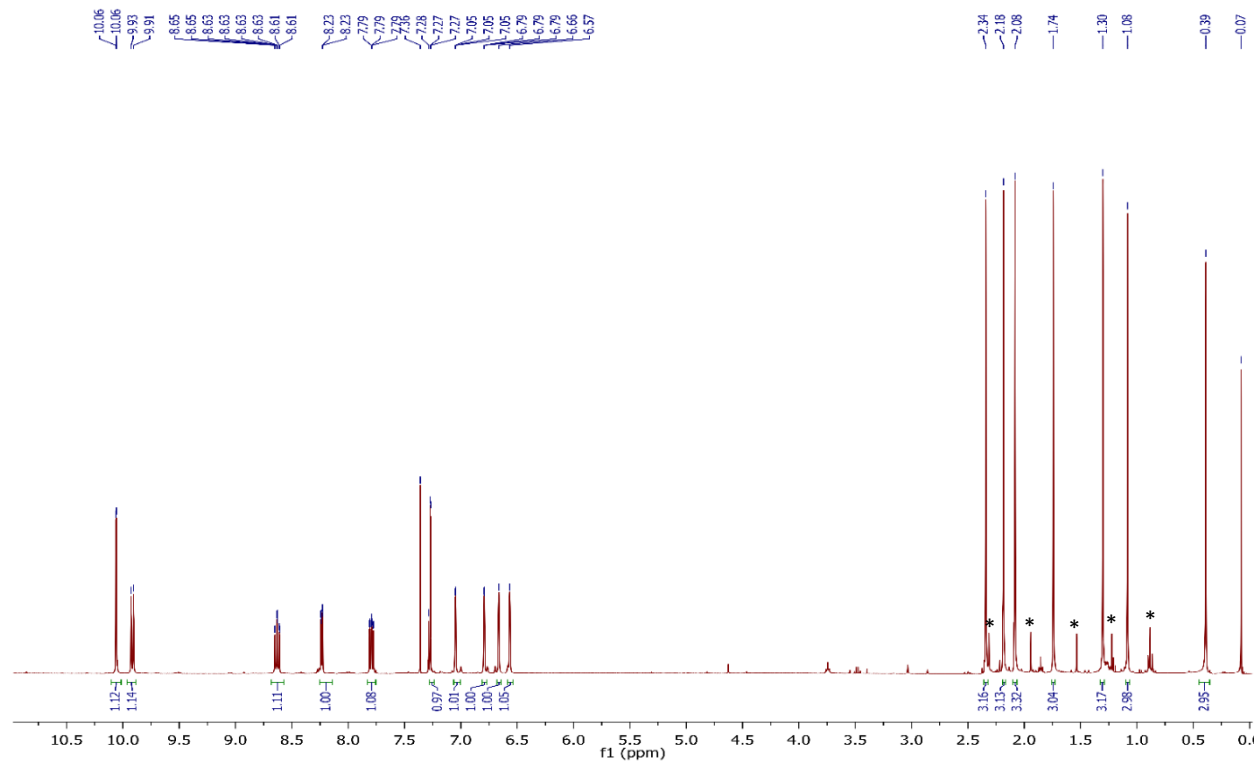

**Figure S7:**  $^1\text{H}$  NMR spectrum of **4** in  $\text{CDCl}_3$  (\*unidentifiable minor impurity)

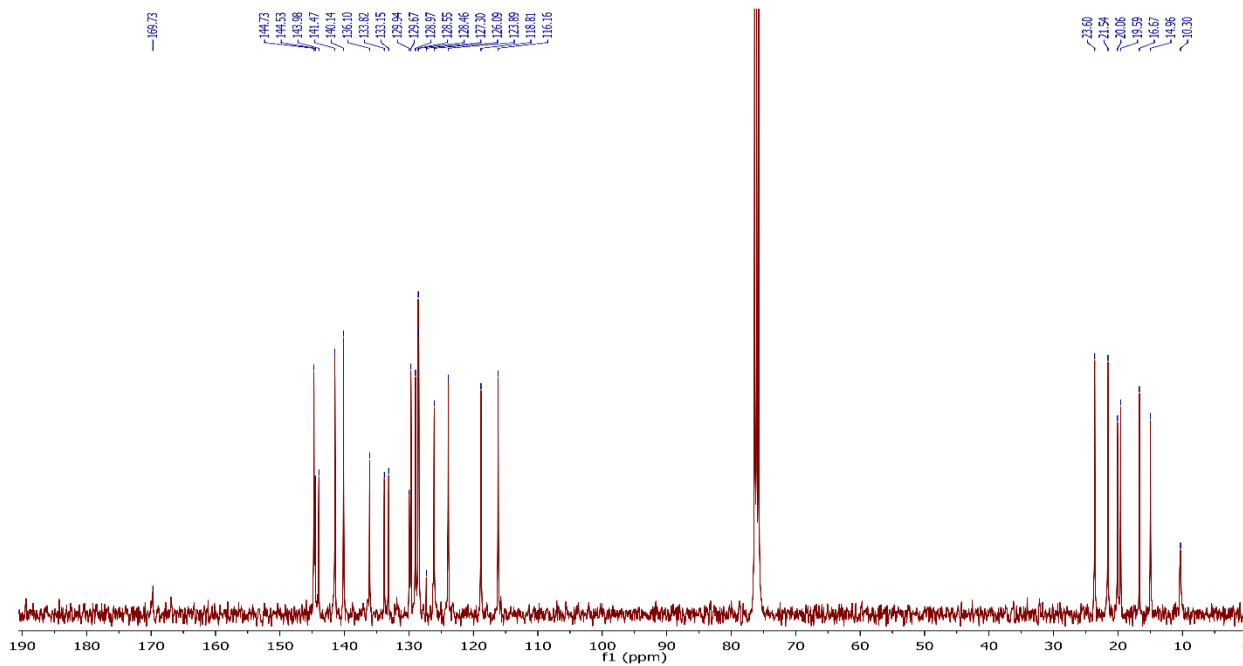

**Figure S8:**  $^{13}\text{C}\{^1\text{H}\}$  NMR spectrum of **4** in  $\text{CDCl}_3$

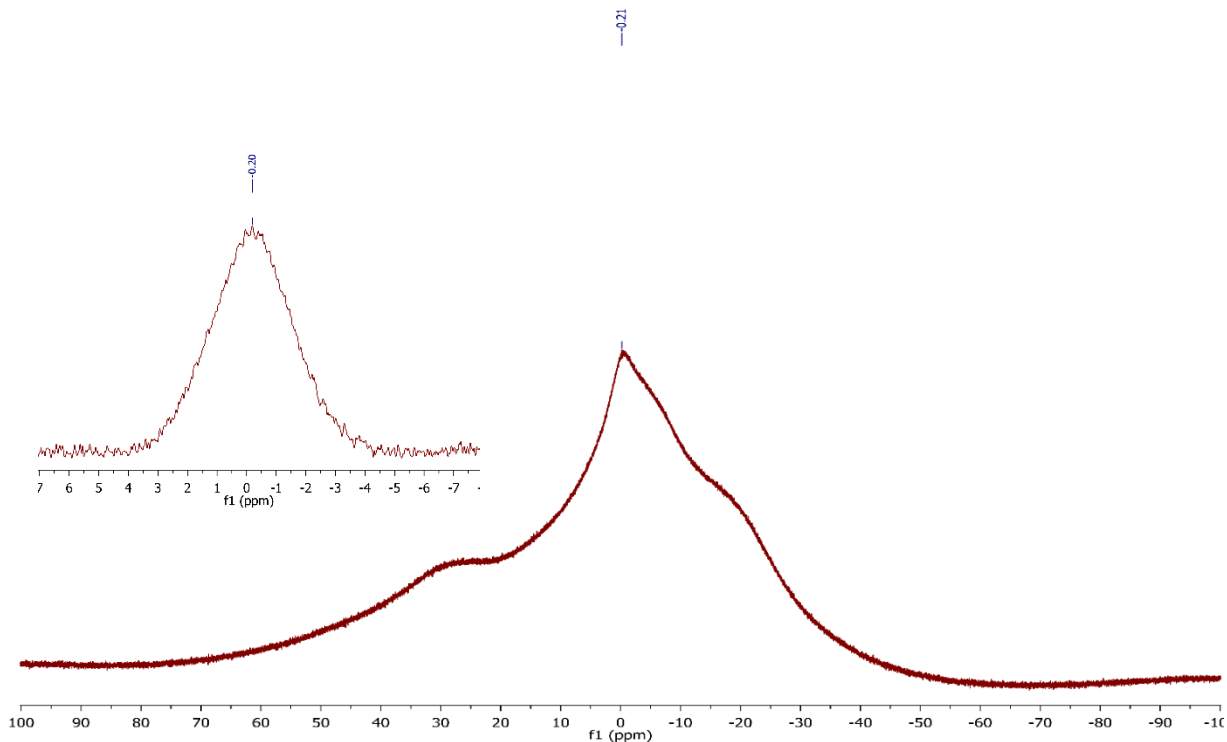

**Figure S9:**  $^{11}\text{B}\{^1\text{H}\}$  NMR spectrum of **4** in  $\text{CDCl}_3$ . Inset is the  $^{11}\text{B}\{^1\text{H}\}$  spectrum with glass peak subtracted.

### Synthesis of **5**:

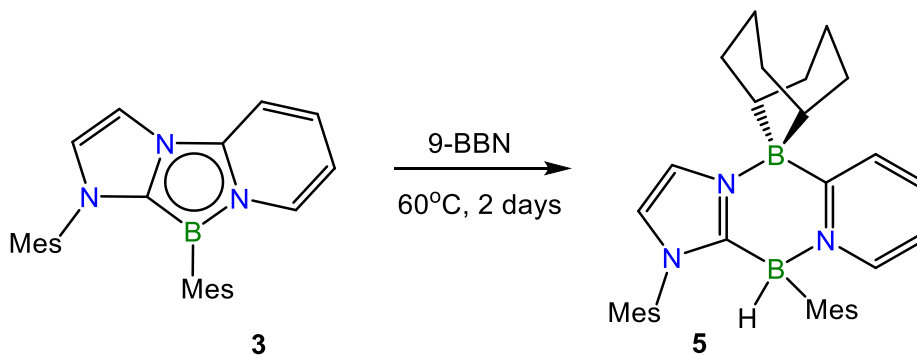

Compound **3** (100 mg, 0.25 mmol) was combined with 9-borabicyclo[3.3.1]nonane (9-BBN) (30 mg, 0.25 mmol) in 8 mL toluene and stirred at  $60^\circ\text{C}$  for 48 hrs. The solution was then filtered, concentrated, and cooled to  $-35^\circ\text{C}$  overnight resulting in the formation of colorless crystals. The crystals were then collected, washed with pentane (2 x 3 mL) and dried under vacuum to obtain **5** as a colorless solid (77 mg, 58%). Crystals suitable for X-ray diffraction were grown from hexane at  $-35^\circ\text{C}$ .

**<sup>1</sup>H NMR (400.1 MHz, C<sub>6</sub>D<sub>6</sub>):**  $\delta$  = 8.03 (dd, 1H, <sup>3</sup>*J* = 8.0 Hz, <sup>4</sup>*J* = 1.0 Hz, CH<sub>Py</sub>), 7.92 (dd, 1H, <sup>3</sup>*J* = 6.2 Hz, <sup>4</sup>*J* = 1.0 Hz, CH<sub>Py</sub>), 7.60 (d, 1H, <sup>3</sup>*J* = 1.7 Hz, CH<sub>Imidaz</sub>), 6.89 (dt, 1H, <sup>3</sup>*J* = 7.5 Hz, <sup>4</sup>*J* = 1.5 Hz, CH<sub>Py</sub>), 6.59 – 6.56 (m, 1H, CH<sub>Mes</sub>), 6.54 (br.s, 1H, CH<sub>Mes</sub>), 6.41 (br.s, 1H, CH<sub>Mes</sub>), 6.30 – 6.26 (m, 1H, CH<sub>Mes</sub>), 6.25 (d, 1H, <sup>3</sup>*J* = 1.8 Hz, CH<sub>Imidaz</sub>), 6.08 (ddd, 1H, <sup>3</sup>*J* = 7.5 Hz, 5.8 Hz, <sup>4</sup>*J* = 1.7 Hz, CH<sub>Py</sub>), 4.95 (br.s, 1H, B-H), 3.00 – 2.80 (m, 2H, 9-BBN), 2.41 (s, 3H, CH<sub>3-Mes</sub>), 2.38 – 2.32 (m, 1H, 9-BBN), 2.32 – 2.20 (m, 3H, 9-BBN), 2.13 (s, 6H, CH<sub>3-Mes</sub>), 2.03 (s, 3H, CH<sub>3-Mes</sub>), 2.02 – 1.97 (m, 3H, CH<sub>3-Mes</sub>), 1.97 – 1.86 (m, 2H, 9-BBN), 1.85 – 1.70 (m, 1H, 9-BBN), 1.70 – 1.61 (m, 1H, CH-9-BBN), 1.60 (s, 3H, CH<sub>3-Mes</sub>), 1.38 – 1.20 (m, 1H, CH-9-BBN), 0.92 – 0.80 (m, 3H, 9-BBN) ppm.

**<sup>13</sup>C{<sup>1</sup>H} NMR (100.6 MHz, C<sub>6</sub>D<sub>6</sub>):** 182.20 (BC<sub>Py</sub>), 166.97 (BC<sub>Imidaz</sub>), 146.18 (CH<sub>Py</sub>), 143.07 (*q*-Mes), 140.61 (*q*-Mes), 137.02 (*q*-Mes), 134.64 (CH<sub>Py</sub>), 134.62 (*q*-Mes), 134.44 (*q*-Mes), 134.37 (*q*-Mes), 133.31 (*q*-Mes), 130.03 (CH<sub>Py</sub>), 128.85 (CH<sub>Mes</sub>), 128.52 (*q*-Mes), 128.22 (CH<sub>Mes</sub>), 128.19 (CH<sub>Mes</sub>), 127.51 (CH<sub>Mes</sub>), 123.52 (CH<sub>Imidaz</sub>), 119.73 (CH<sub>Imidaz</sub>), 119.67 (CH<sub>Py</sub>), 35.82 (CH<sub>2</sub>-9-BBN), 34.09 (CH<sub>2</sub>-9-BBN), 32.75 (CH<sub>3-Mes</sub>), 30.71 (CH<sub>2</sub>-9-BBN), 24.91 (CH-9-BBN), 24.35 (CH<sub>2</sub>-9-BBN), 24.19 (CH<sub>3-Mes</sub>), 23.62 (CH<sub>2</sub>-9-BBN), 21.68 (CH-9-BBN), 21.35 (CH<sub>2</sub>-9-BBN), 20.64 (CH<sub>3-Mes</sub>), 20.42 (CH<sub>3-Mes</sub>), 18.01 (CH<sub>3-Mes</sub>), 17.61 (CH<sub>3-Mes</sub>) ppm.

**<sup>11</sup>B{<sup>1</sup>H} NMR (128.4 MHz, C<sub>6</sub>D<sub>6</sub>):**  $\delta$  = -5.6 (9-BBN), -8.5 ppm (B-Mes) ppm.

**HRMS (ESI):** C<sub>34</sub>H<sub>43</sub>B<sub>2</sub>N<sub>3</sub> Calculated for [M+H]<sup>+</sup> 516.3721, observed 516.3727

**MP:** 230 °C (decomp)

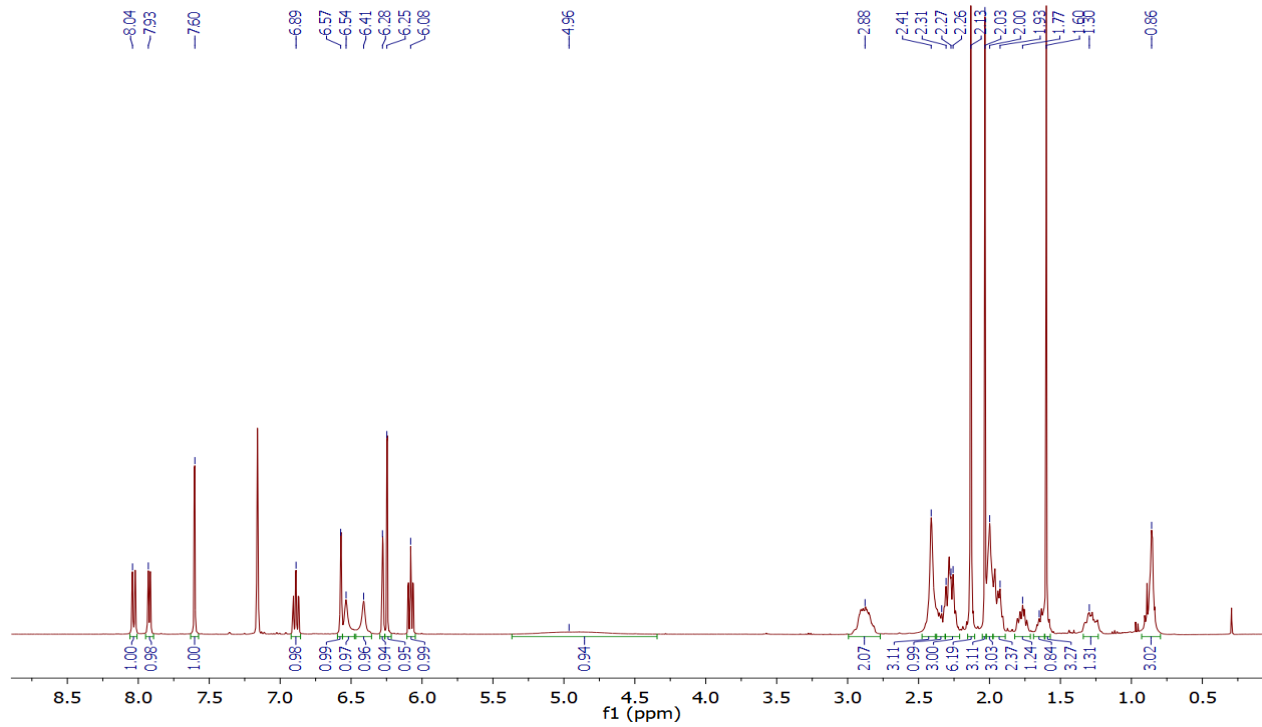

**Figure S10:**  $^1\text{H}$  NMR spectrum of **5** in  $\text{C}_6\text{D}_6$

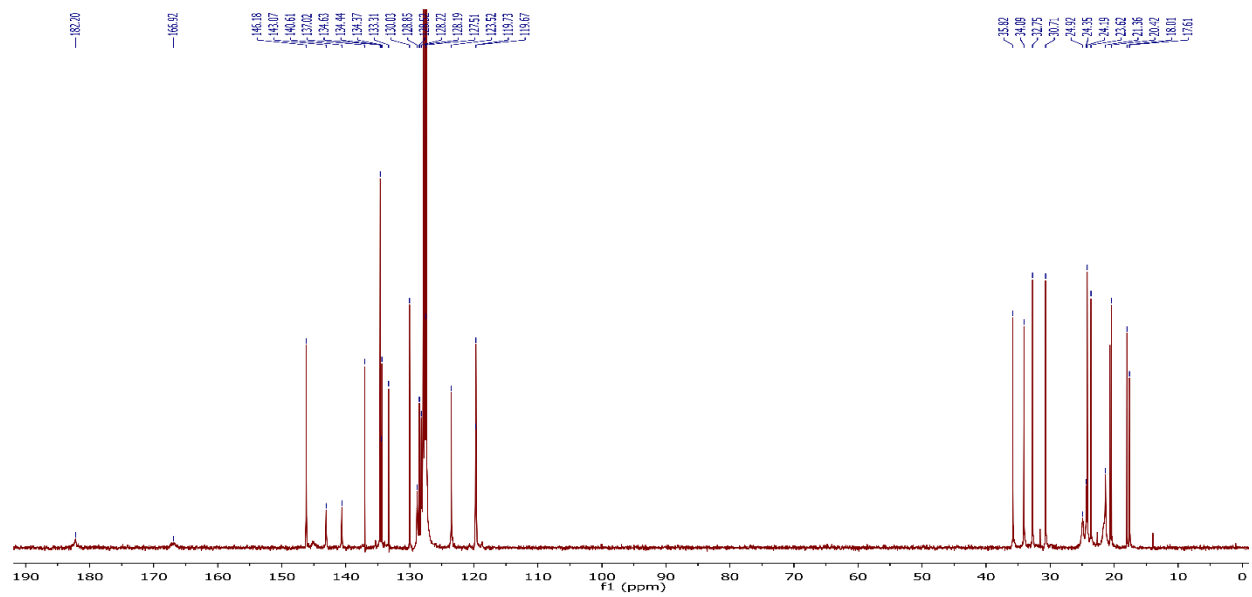

**Figure S11:**  $^{13}\text{C}\{^1\text{H}\}$  NMR spectrum of **5** in  $\text{C}_6\text{D}_6$

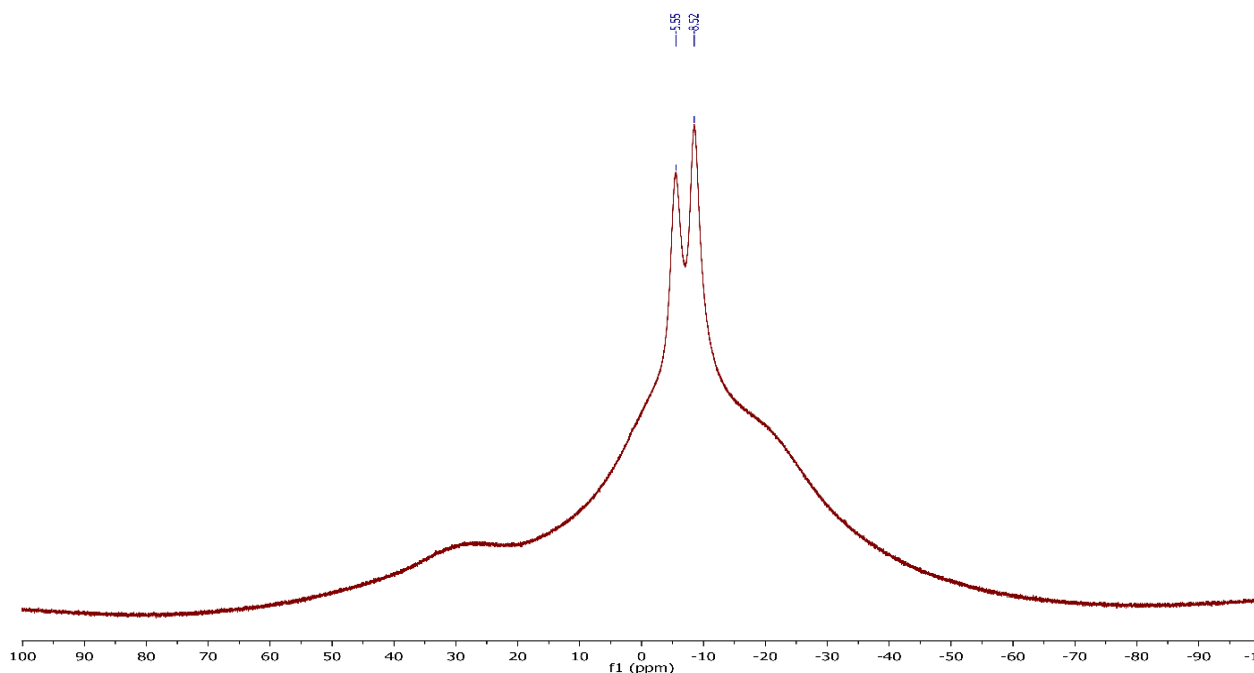

**Figure S12:**  $^{11}\text{B}\{^1\text{H}\}$  NMR spectrum of **5** in  $\text{C}_6\text{D}_6$

### Synthesis of **6**:

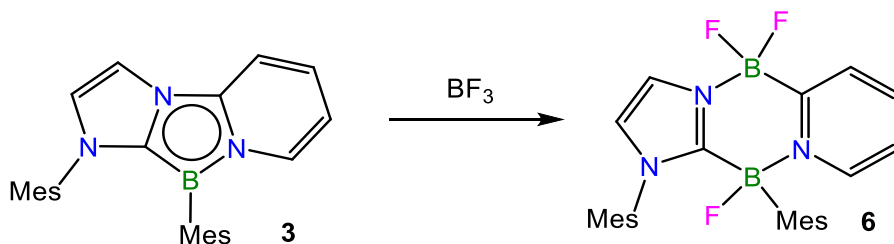

To a 5 mL of toluene solution of **3** (100 mg, 0.25 mmol) was added  $\text{BF}_3 \cdot \text{OEt}_2$  (40 mg, 0.28 mmol) and the mixture was stirred for 30 mins at room temperature. All volatiles were removed and the residue was washed with hexane (3 x 3 mL) and dried under vacuum affording **6** as an off-white solid (52 mg, 44%). Crystals suitable for X-ray diffraction were obtained from a benzene solution layered with hexane.

$^1\text{H}$  NMR (400.1 MHz,  $\text{C}_6\text{D}_6$ ):  $\delta$  = 8.06 (d, 1H,  $^3J$  = 7.8 Hz,  $\text{CH}_{\text{Py}}$ ), 7.96 (d, 1H,  $^3J$  = 6.2 Hz,  $\text{CH}_{\text{Py}}$ ), 7.47 (s, 1H,  $\text{CH}_{\text{Imidaz}}$ ), 6.81 (t, 1H,  $^3J$  = 7.8 Hz,  $\text{CH}_{\text{Py}}$ ), 6.67 (s, 1H,  $\text{CH}_{\text{Mes}}$ ), 6.60 (br.s, 2H,  $\text{CH}_{\text{Mes}}$ ), 6.43 (s, 1H,  $\text{CH}_{\text{Mes}}$ ), 6.12 (t, 1H,  $^3J$  = 6.2 Hz,  $\text{CH}_{\text{Py}}$ ), 5.93 (s, 1H,  $\text{CH}_{\text{Imidaz}}$ ), 2.12 (s, 3H,  $\text{CH}_3\text{-Mes}$ ), 2.06 (s, 3H,  $\text{CH}_3\text{-Mes}$ ), 1.95 (br.s, 9H,  $\text{CH}_3\text{-Mes}$ ), 1.21 (s, 3H,  $\text{CH}_3\text{-Mes}$ ) ppm.

**$^{13}\text{C}\{^1\text{H}\}$  NMR (100.6 MHz,  $\text{C}_6\text{D}_6$ ):** 154.66 ( $\text{BC}_{\text{Py}}$ ), 146.34 ( $\text{BC}_{\text{Imidaz}}$ ), 144.23 ( $\text{CH}_{\text{Py}}$ ), 139.23 ( $q\text{-Mes}$ ), 139.13 ( $q\text{-Mes}$ ), 137.16 ( $q\text{-Mes}$ ), 136.46 ( $q\text{-Mes}$ ), 136.04 ( $q\text{-Mes}$ ), 133.30 ( $q\text{-Mes}$ ), 129.69 ( $\text{CH}_{\text{Mes}}$ ), 129.58 ( $\text{CH}_{\text{Mes}}$ ), 129.11 ( $\text{CH}_{\text{Py}}$ ), 128.57 ( $\text{CH}_{\text{Mes}}$ ), 128.39 ( $\text{CH}_{\text{Py}}$ ), 128.16 ( $\text{CH}_{\text{Mes}}$ ), 127.92 ( $q\text{-Mes}$ ), 127.89 ( $q\text{-Mes}$ ), 123.39 ( $\text{CH}_{\text{Imidaz}}$ ), 122.56 ( $\text{CH}_{\text{Py}}$ ), 120.90 ( $\text{CH}_{\text{Imidaz}}$ ), 22.98 ( $\text{CH}_3\text{-Mes}$ ), 22.91 ( $\text{CH}_3\text{-Mes}$ ), 20.91 ( $\text{CH}_3\text{-Mes}$ ), 17.49 ( $\text{CH}_3\text{-Mes}$ ), 17.43 ( $\text{CH}_3\text{-Mes}$ ), 16.46 ( $\text{CH}_3\text{-Mes}$ ) ppm.

**$^{11}\text{B}\{^1\text{H}\}$  NMR (128.4 MHz,  $\text{C}_6\text{D}_6$ ):**  $\delta$  4.1, 1.4 ppm.

**$^{19}\text{F}$  NMR (376.5 MHz,  $\text{C}_6\text{D}_6$ ):**  $\delta$  = -143.5 to -144.4 (m, 1F, C-BF<sub>2</sub>-N), -147.9 to -148.9 (m, 1F, C-BF<sub>2</sub>-N), -158.9 to -160.1 (m, 1F, Mes-B-F) ppm.

**HRMS (ESI):**  $\text{C}_{26}\text{H}_{28}\text{B}_2\text{N}_3\text{F}_3$  Calculated for  $[\text{3M}]^+$  1382.7300, observed 1382.7305

**MP:** 262 °C (decomp)

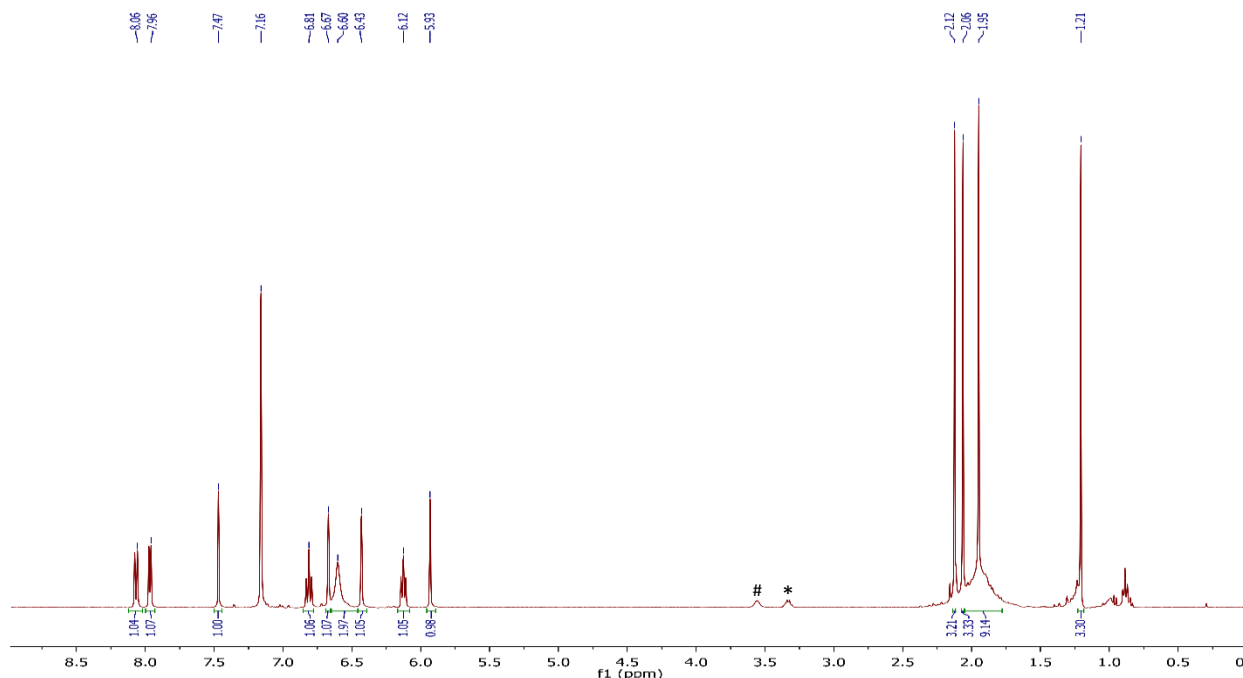

**Figure S13:**  $^1\text{H}$  NMR spectrum of **6** in  $\text{C}_6\text{D}_6$  (\*diethylether, # $\text{BF}_3\cdot\text{OEt}_2$ )

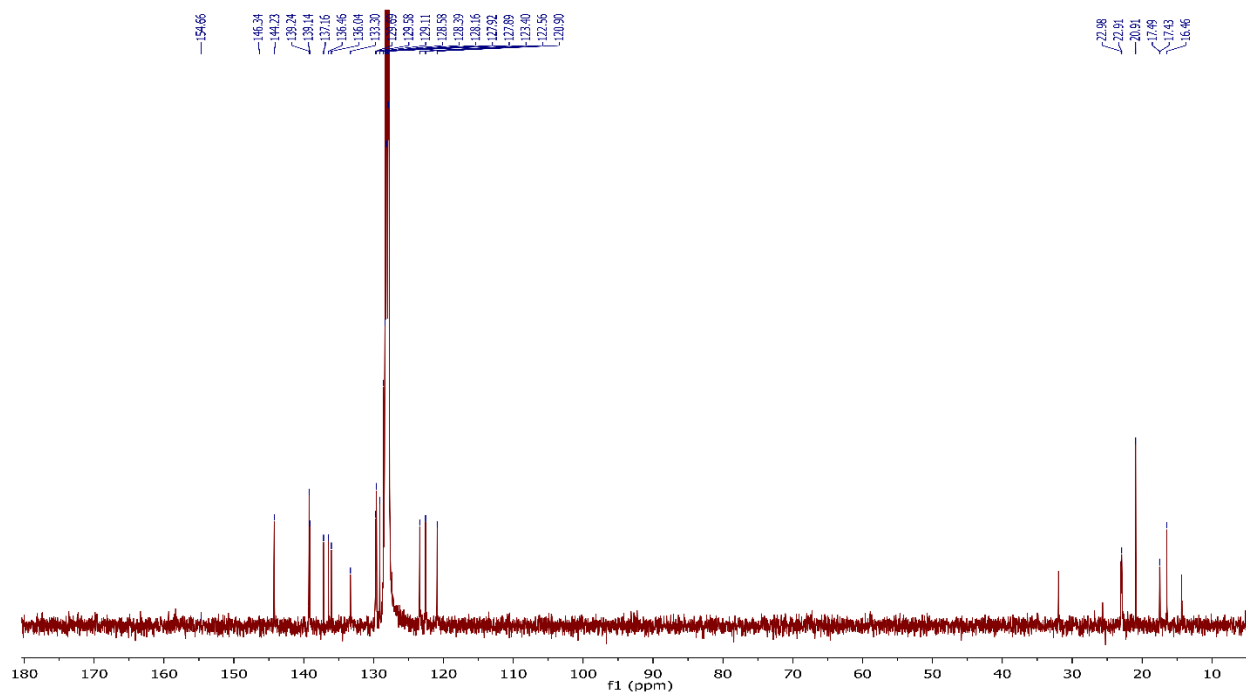

**Figure S14:**  $^{13}\text{C}\{^1\text{H}\}$  NMR spectrum of **6** in  $\text{C}_6\text{D}_6$

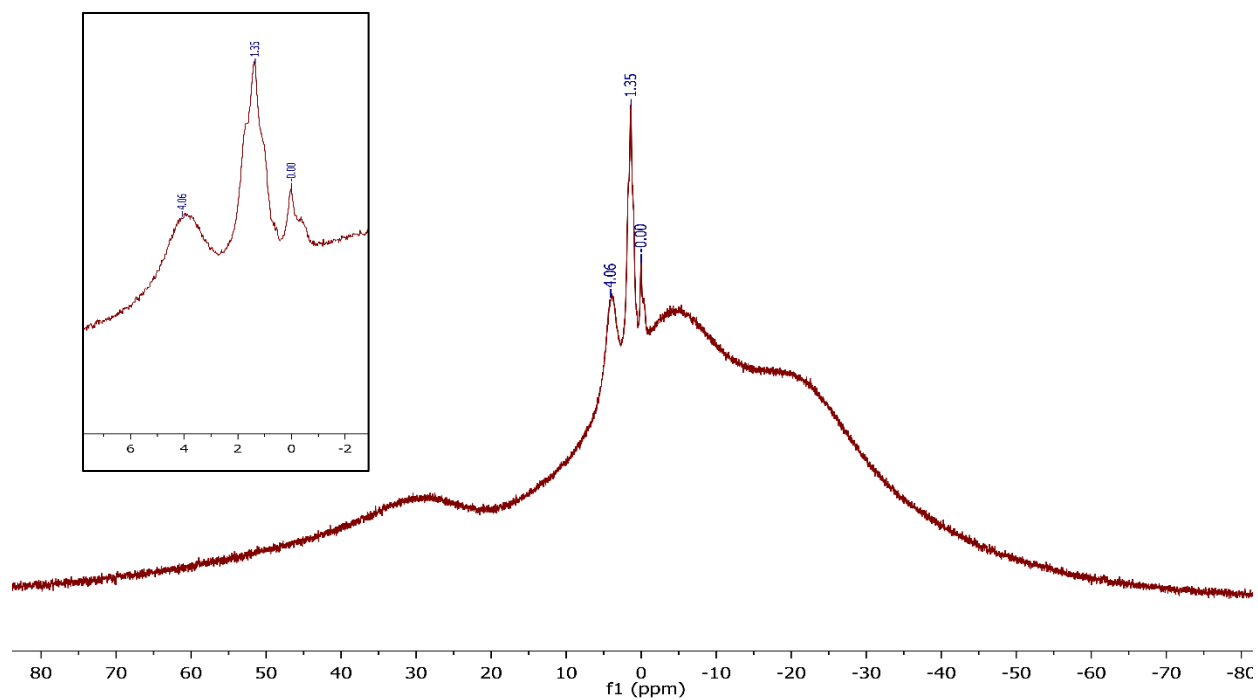

**Figure S15:**  $^{11}\text{B}\{^1\text{H}\}$  NMR spectrum of **6** in  $\text{C}_6\text{D}_6$ .  $\text{BF}_3 \cdot \text{OEt}_2$  is identifiable as a minor impurity at 0 ppm.

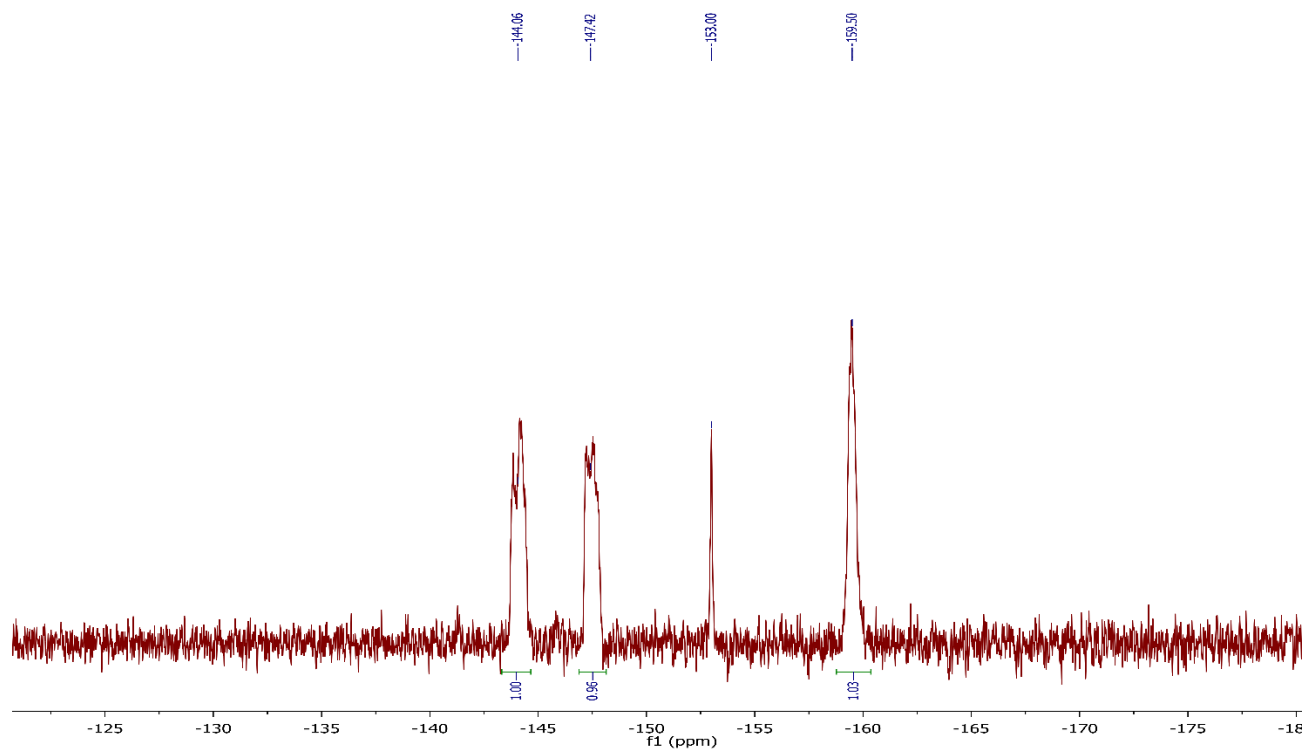

**Figure S16:**  $^{19}\text{F}$  NMR spectrum of **6** in  $\text{C}_6\text{D}_6$ .  $\text{BF}_3 \cdot \text{OEt}_2$  is identifiable as a minor impurity at  $-153.0$  ppm.

### Synthesis of **7**

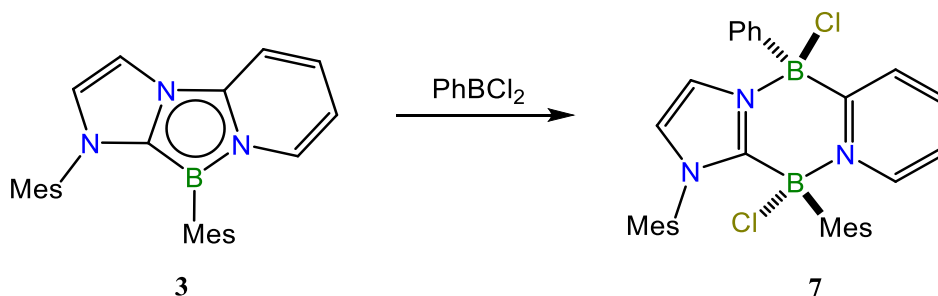

To a 5 mL benzene solution of **3** (100 mg, 0.25 mmol) was added  $\text{PhBCl}_2$  in 3 mL hexane (40 mg, 0.28 mmol) with vigorous stirring. The reaction mixture was left undisturbed overnight resulting in the formation of colourless crystals. The crystals were collected, washed with hexane (3x 3 mL) and dried under vacuum to afford **7** as a colourless solid (73 mg, 52%). Crystals suitable for X-ray diffraction were grown from slow evaporation of a benzene solution.



**$^1\text{H}$  NMR (400.1 MHz,  $\text{C}_6\text{D}_6$ ):**  $\delta$  = 8.32 – 8.22 (m, 2H,  $\text{CH}_{\text{phenyl}}$ ), 7.98 (d, 1H,  $^3J$  = 6.3 Hz,  $\text{CH}_{\text{Py}}$ ), 7.85 (d, 1H,  $^3J$  = 8.0 Hz,  $\text{CH}_{\text{Py}}$ ), 7.46 – 7.34 (m, 3H,  $\text{CH}_{\text{phenyl}}$ ), 7.16 (s, 1H,  $\text{CH}_{\text{Imidaz}}$ ), 6.72 (s, 1H,  $\text{CH}_{\text{Mes}}$ ), 6.65 (s, 1H,  $\text{CH}_{\text{Mes}}$ ), 6.57 (t, 1H,  $^3J$  = 8.0 Hz,  $\text{CH}_{\text{Py}}$ ), 6.55 (s, 1H,  $\text{CH}_{\text{Mes}}$ ), 6.42 (s, 1H,  $\text{CH}_{\text{Mes}}$ ), 5.96 (t, 1H,  $^3J$  = 6.3 Hz,  $\text{CH}_{\text{Py}}$ ), 5.78 (s, 1H,  $\text{CH}_{\text{Imidaz}}$ ), 2.31 (s, 3H,  $\text{CH}_3\text{-Mes}$ ), 2.12 (s, 6H,  $\text{CH}_3\text{-Mes}$ ), 2.07 (s, 3H,  $\text{CH}_3\text{-Mes}$ ), 1.77 (s, 3H,  $\text{CH}_3\text{-Mes}$ ), 1.15 (s, 3H,  $\text{CH}_3\text{-Mes}$ ) ppm.

**$^{13}\text{C}\{^1\text{H}\}$  NMR (100.6 MHz,  $\text{C}_6\text{D}_6$ ):**  $\delta$  = 173.15 ( $\text{BC}_{\text{Py}}$ ), 155.51 ( $\text{BC}_{\text{Imidaz}}$ ), 148.49 ( $q\text{-CH}_{\text{phenyl}}$ ), 145.43 ( $q\text{-Mes}$ ), 143.70 ( $\text{CH}_{\text{Py}}$ ), 142.59 ( $q\text{-Mes}$ ), 138.94 ( $q\text{-Mes}$ ), 137.48 ( $\text{CH}_{\text{Py}}$ ), 136.48 ( $q\text{-Mes}$ ), 136.35 ( $q\text{-Mes}$ ), 136.31 ( $q\text{-Mes}$ ), 135.55 ( $\text{CH}_{\text{phenyl}}$ ), 133.84 ( $q\text{-Mes}$ ), 132.73 ( $q\text{-Mes}$ ), 132.64 ( $\text{CH}_{\text{Py}}$ ), 132.56 ( $\text{CH}_{\text{phenyl}}$ ), 130.45 ( $\text{CH}_{\text{Mes}}$ ), 129.86 ( $\text{CH}_{\text{Mes}}$ ), 128.91 ( $\text{CH}_{\text{Mes}}$ ), 128.25 ( $\text{CH}_{\text{Mes}}$ ), 1268.21 ( $\text{CH}_{\text{phenyl}}$ ), 128.01 ( $\text{CH}_{\text{phenyl}}$ ), 126.83 ( $\text{CH}_{\text{phenyl}}$ ), 123.55 ( $\text{CH}_{\text{Imidaz}}$ ), 122.93 ( $\text{CH}_{\text{Imidaz}}$ ), 121.86 ( $\text{CH}_{\text{Py}}$ ), 25.08 ( $\text{CH}_3\text{-Mes}$ ), 23.86 ( $\text{CH}_3\text{-Mes}$ ), 20.47 ( $\text{CH}_3\text{-Mes}$ ), 20.38 ( $\text{CH}_3\text{-Mes}$ ), 18.57 ( $\text{CH}_3\text{-Mes}$ ), 16.13 ( $\text{CH}_3\text{-Mes}$ ) ppm.

**$^{11}\text{B}\{^1\text{H}\}$  NMR (128.4 MHz,  $\text{C}_6\text{D}_6$ ):**  $\delta$  = 0.7 ppm.

**HRMS (ESI):**  $\text{C}_{32}\text{H}_{33}\text{B}_2\text{N}_3\text{Cl}_2$  Calculated for  $[\text{M-Cl}]^-$  514.2622, observed 514.2670

**MP:** 220 °C (decomp)

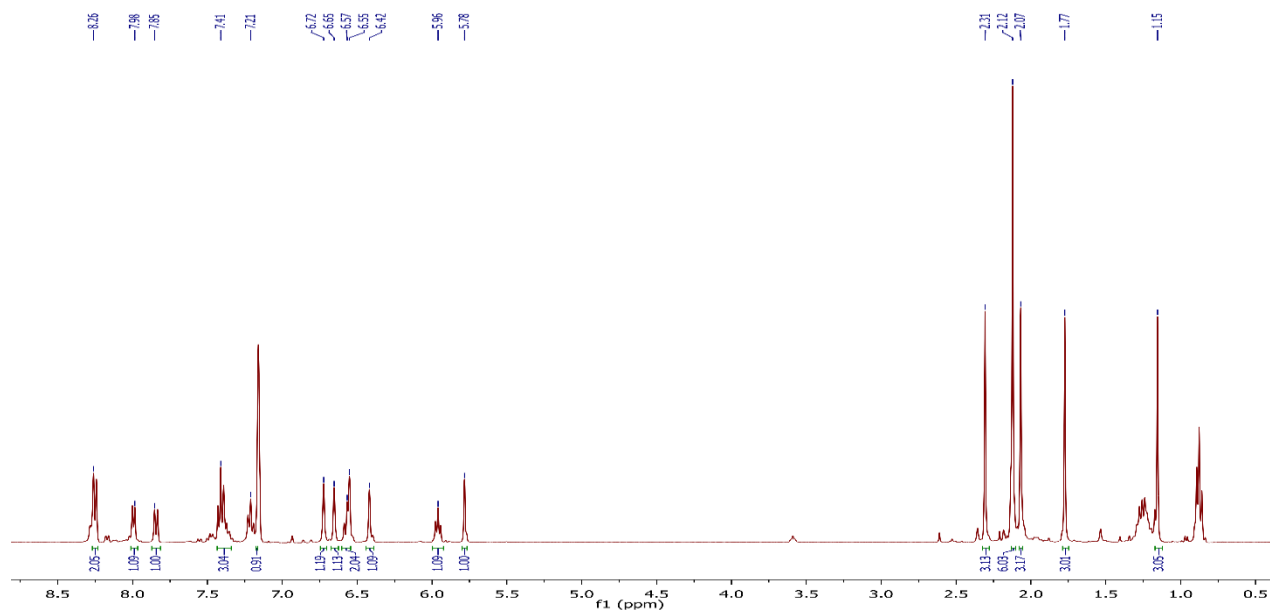

**Figure S17:**  $^1\text{H}$  NMR spectrum of **7** in  $\text{C}_6\text{D}_6$ . Peak at 7.21 ppm corresponds to excess  $\text{PhBCl}_2$ . Peaks at 0.89 and 1.24 ppm correspond to residual solvent hexane.

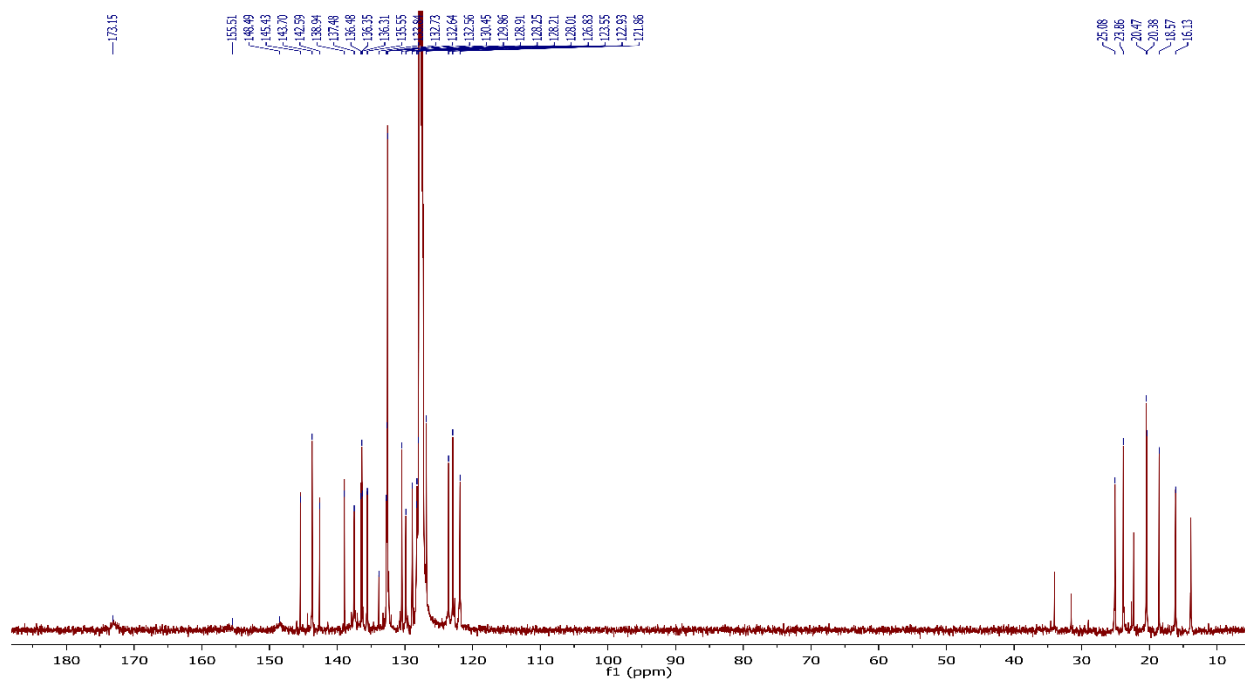

**Figure S18:**  $^{13}\text{C}\{^1\text{H}\}$  NMR spectrum of **7** in  $\text{C}_6\text{D}_6$

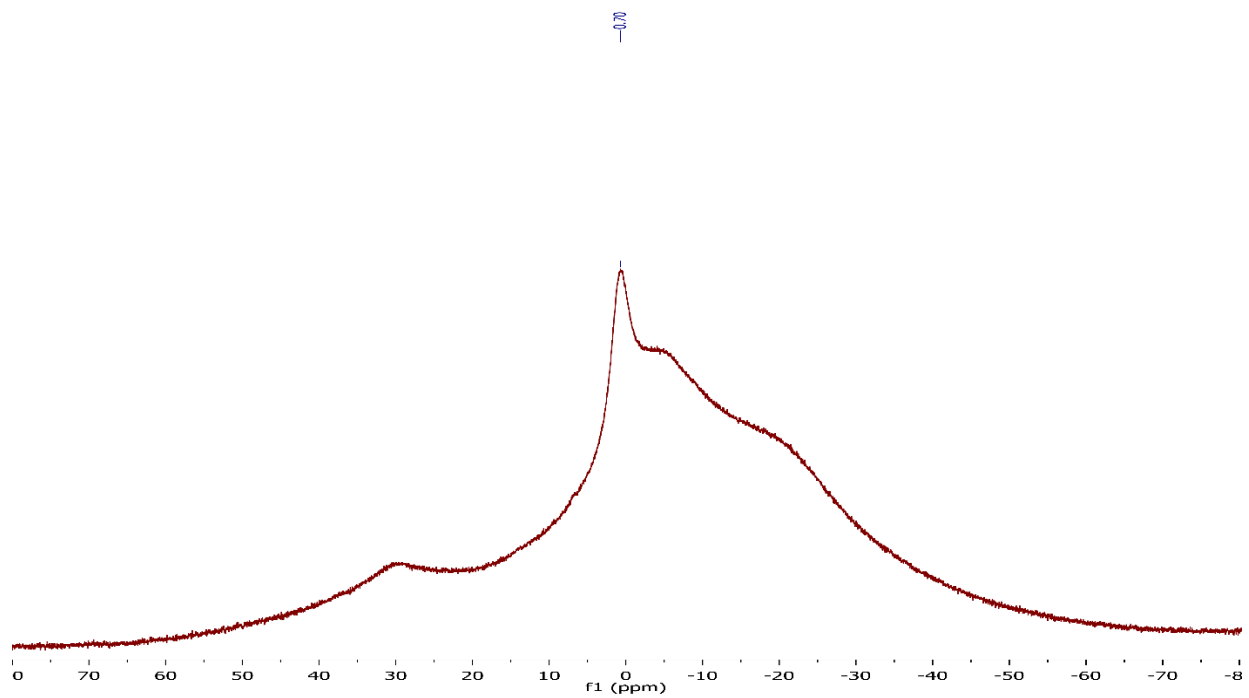

**Figure S19:**  $^{11}\text{B}\{^1\text{H}\}$  NMR spectrum of **7** in  $\text{C}_6\text{D}_6$

## Synthesis of **8**

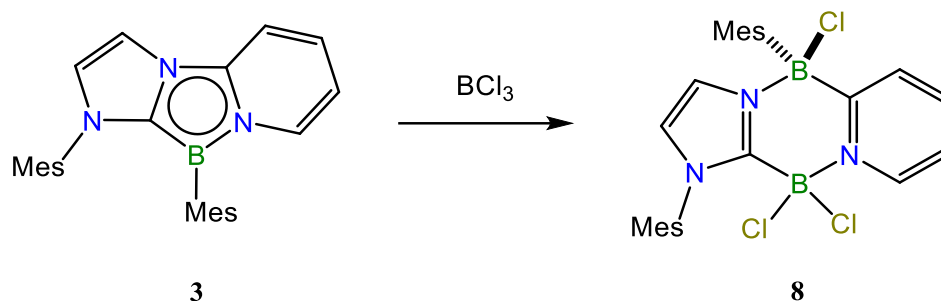

To a 5 mL of a benzene solution of **3** (100 mg, 0.25 mmol) was added  $\text{BCl}_3$  in hexane (30 mg, 0.28 mmol) under stirring. The reaction mixture was left undisturbed overnight resulting in the formation of colourless crystals. Crystals were collected, washed with hexane (3x 3 mL) and dried under vacuum to afford **8** as a colourless solid (82 mg, 63%). Crystals suitable for single crystal X-ray diffraction were grown from slow evaporation of a benzene solution.

**$^1\text{H}$  NMR (400.1 MHz,  $\text{C}_6\text{D}_6$ ):**  $\delta$  = 8.84 (d, 1H,  $^3J$  = 6.3 Hz,  $\text{CH}_{\text{Py}}$ ), 7.38 (d, 1H,  $^3J$  = 8.0 Hz,  $\text{CH}_{\text{Py}}$ ), 6.94 (s, 2H,  $\text{CH}_{\text{Mes}}$ ), 6.77 (s, 1H,  $\text{CH}_{\text{Imidaz}}$ ), 6.73 (s, 2H,  $\text{CH}_{\text{Mes}}$ ), 6.55 (t, 1H,  $^3J$  = 7.7 Hz,  $\text{CH}_{\text{Py}}$ ), 6.16 (t, 1H,  $^3J$  = 6.9 Hz,  $\text{CH}_{\text{Py}}$ ), 5.82 (s, 1H,  $\text{CH}_{\text{Imidaz}}$ ), 2.52 (s, 6H, *o*- $\text{CH}_3$ -Mes), 2.24 (s, 3H, *p*- $\text{CH}_3$ -Mes), 2.13 (s, 3H, *p*- $\text{CH}_3$ -Mes), 2.04 (s, 6H, *o*- $\text{CH}_3$ -Mes) ppm.

**$^{13}\text{C}\{^1\text{H}\}$  NMR (100.6 MHz,  $\text{C}_6\text{D}_6$ ):**  $\delta$  = 144.11, 143.29, 140.11, 139.79, 136.76, 136.66, 135.89, 133.56, 131.02 ( $\text{CH}_{\text{Mes}}$ ), 130.13 ( $\text{CH}_{\text{Mes}}$ ), 129.49 ( $\text{CH}_{\text{Mes}}$ ), 129.03 ( $\text{CH}_{\text{Mes}}$ ), 128.58, 128.14, 127.94, 124.07, 123.16, 122.24, 60.06, 38.61, 31.71, 30.23 ( $\text{CH}_3$ -Mes), 25.49 ( $\text{CH}_3$ -Mes), 21.06 ( $\text{CH}_3$ -Mes), 20.92 ( $\text{CH}_3$ -Mes), 18.73 ( $\text{CH}_3$ -Mes) ppm. Note: The signals for B-bound C atoms could not be identified due to quadrupolar broadening.

**$^{11}\text{B}\{^1\text{H}\}$  NMR (128.4 MHz,  $\text{C}_6\text{D}_6$ ):**  $\delta$  1.4, -0.2 ppm.

**HRMS (ESI):**  $\text{C}_{26}\text{H}_{28}\text{B}_2\text{N}_3\text{Cl}_3$  Calculated for  $[\text{M}-2\text{Cl}]^-$  240.6425, observed 240.6459

**MP:** 195°C (decomp)

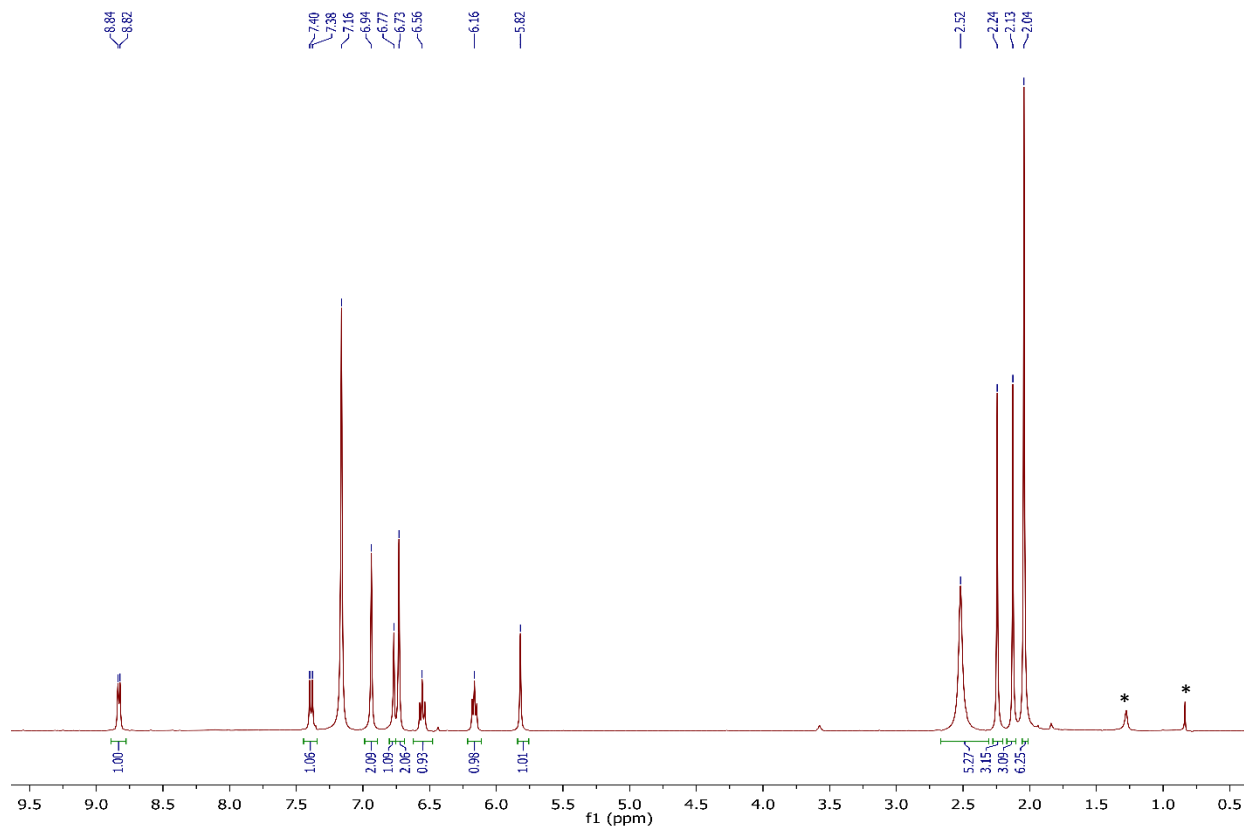

Figure S20:  $^1\text{H}$  NMR spectrum of **8** in  $\text{C}_6\text{D}_6$ .

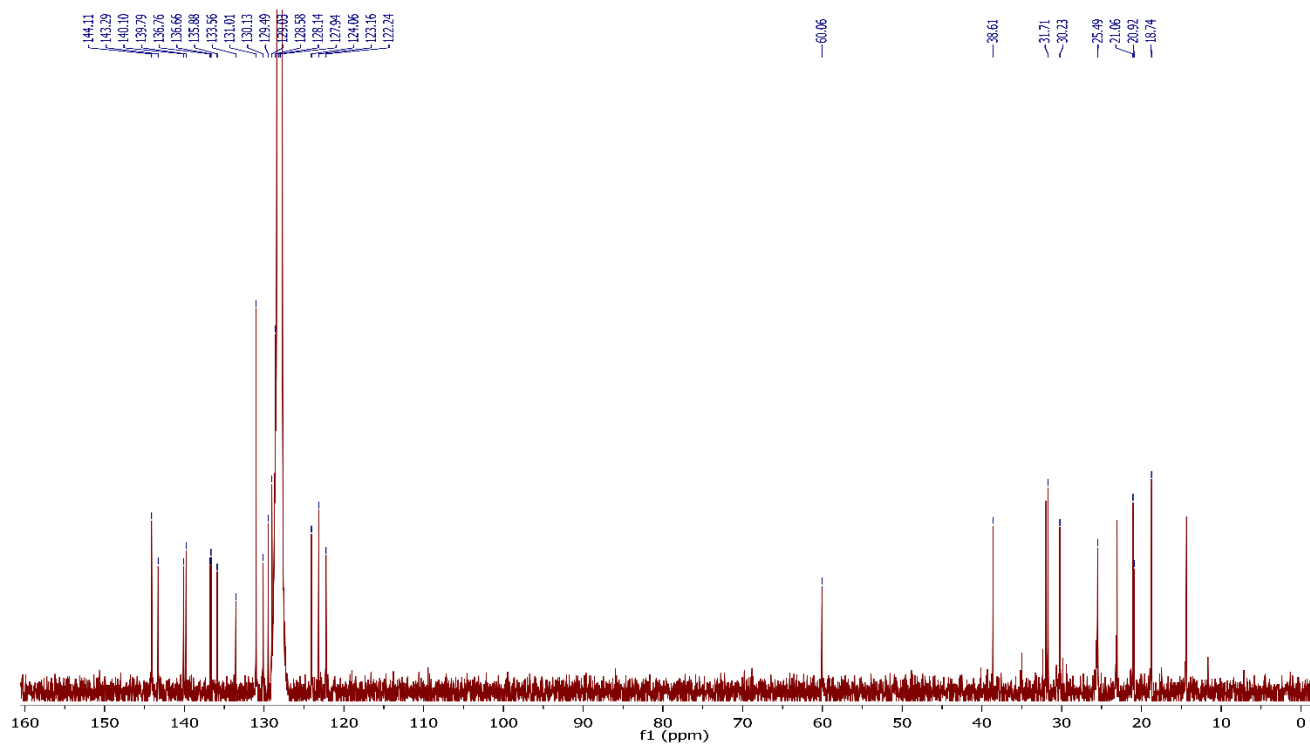

Figure S21:  $^{13}\text{C}\{^1\text{H}\}$  NMR spectrum of **8** in  $\text{C}_6\text{D}_6$

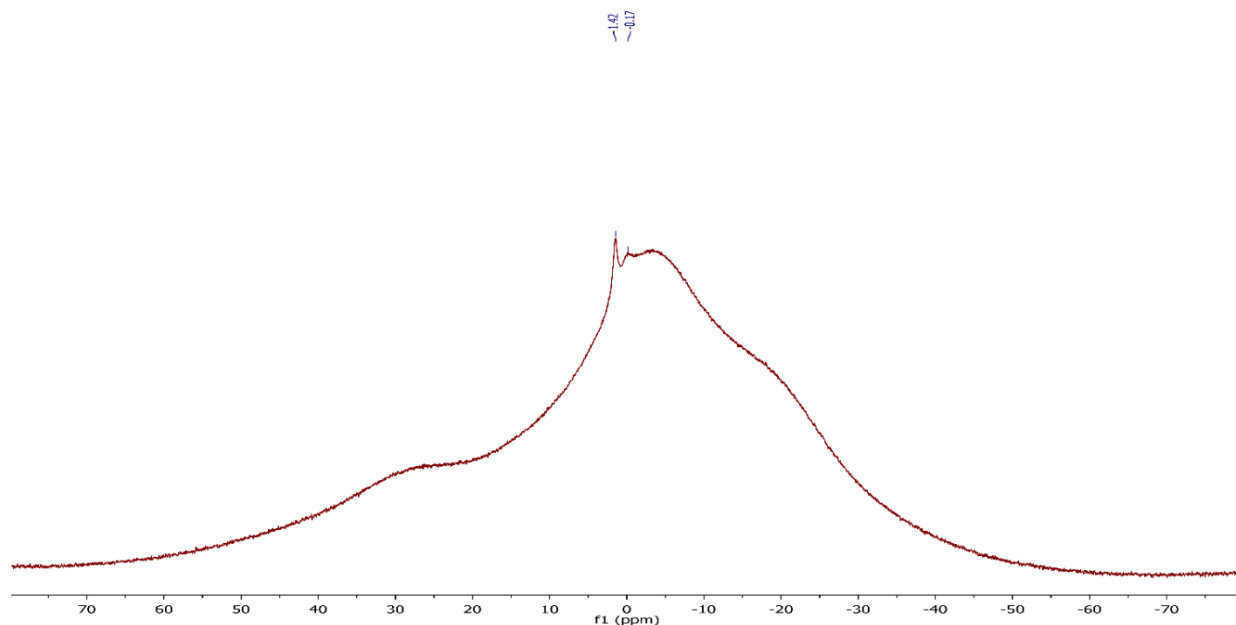

**Figure S22:**  $^{11}\text{B}\{^1\text{H}\}$  NMR spectrum of **8** in  $\text{C}_6\text{D}_6$

## Synthesis of **9**

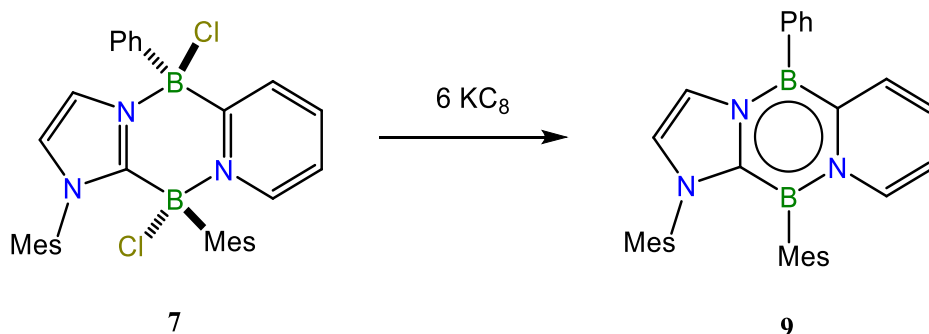

Potassium graphite (74 mg, 0.54 mmol) was added to a solution of **7** (50 mg, 0.09 mmol) in 5 mL benzene and stirred overnight at  $50^\circ\text{C}$ . Once cooled, the reaction mixture was then filtered and dried under vacuum to afford **9** as a red powder (33 mg, 75%). Crystals suitable for single crystal X-ray diffraction were grown from slow evaporation of a benzene solution.

$^1\text{H}$  NMR (400.1 MHz,  $\text{C}_6\text{D}_6$ ):  $\delta$  = 8.11 – 8.04 (m, 1H,  $\text{CH}_{\text{Py}}$ ), 7.89 (d, 2H,  $^3J = 7.2$  Hz,  $\text{CH}_{\text{Ph}}$ ), 7.78 – 7.73 (m, 1H,  $\text{CH}_{\text{Py}}$ ), 7.69 (d, 1H,  $^3J = 1.6$  Hz,  $\text{CH}_{\text{Imidaz}}$ ), 7.44 (t, 2H,  $^3J = 7.3$  Hz,  $\text{CH}_{\text{Ph}}$ ), 7.34 (t, 2H,  $^3J = 7.3$  Hz,  $\text{CH}_{\text{Ph}}$ ), 6.57 (s, 2H,  $\text{CH}_{\text{Mes}}$ ), 6.38 (s, 2H,  $\text{CH}_{\text{Mes}}$ ), 6.22 (d, 1H,  $^3J = 1.6$  Hz,

CH<sub>Imidaz</sub>), 6.14 – 6.08 (m, 2H, CH<sub>Py</sub>), 2.20 (s, 3H, *p*-CH<sub>3-Mes</sub>), 2.03 (s, 3H, *p*-CH<sub>3-Mes</sub>), 1.97 (s, 6H, *o*-CH<sub>3-Mes</sub>), 1.66 (s, 6H, *o*-CH<sub>3-Mes</sub>) ppm.

<sup>13</sup>C{<sup>1</sup>H} NMR (100.6 MHz, C<sub>6</sub>D<sub>6</sub>): δ = 141.17 (*q*-Mes), 138.02 (*q*-Mes), 136.57 (*q*-Phenyl), 136.16 (*q*-Mes), 135.85 (CH<sub>phenyl</sub>), 135.20 (CH<sub>phenyl</sub>), 134.60 (CH<sub>Py</sub>), 131.92 (CH<sub>Py</sub>), 128.58 (CH<sub>phenyl</sub>), 128.50 (*q*-Mes), 128.41 (CH<sub>phenyl</sub>), 127.35 (CH<sub>Mes</sub>), 127.02 (CH<sub>Mes</sub>), 126.99 (CH<sub>Mes</sub>), 126.97 (CH<sub>Mes</sub>), 124.42 (*q*-Mes), 124.35 (CH<sub>Imidaz</sub>), 117.22 (CH<sub>Py</sub>), 117.19 (CH<sub>Imidaz</sub>), 111.98 (CH<sub>Py</sub>), 22.85 (CH<sub>3-Mes</sub>), 21.33 (CH<sub>3-Mes</sub>), 20.91 (CH<sub>3-Mes</sub>), 18.07 (CH<sub>3-Mes</sub>) ppm. Note: The signals for B-bound C atoms could not be identified due to quadrupolar broadening.

<sup>11</sup>B{<sup>1</sup>H} NMR (128.4 MHz, C<sub>6</sub>D<sub>6</sub>): δ = 27.4, 24.0 ppm.

HRMS (ESI): C<sub>32</sub>H<sub>33</sub>B<sub>2</sub>N<sub>3</sub> Calculated for [M]<sup>+</sup> 437.2231, observed 437.2275

MP: 242 °C (decomp)

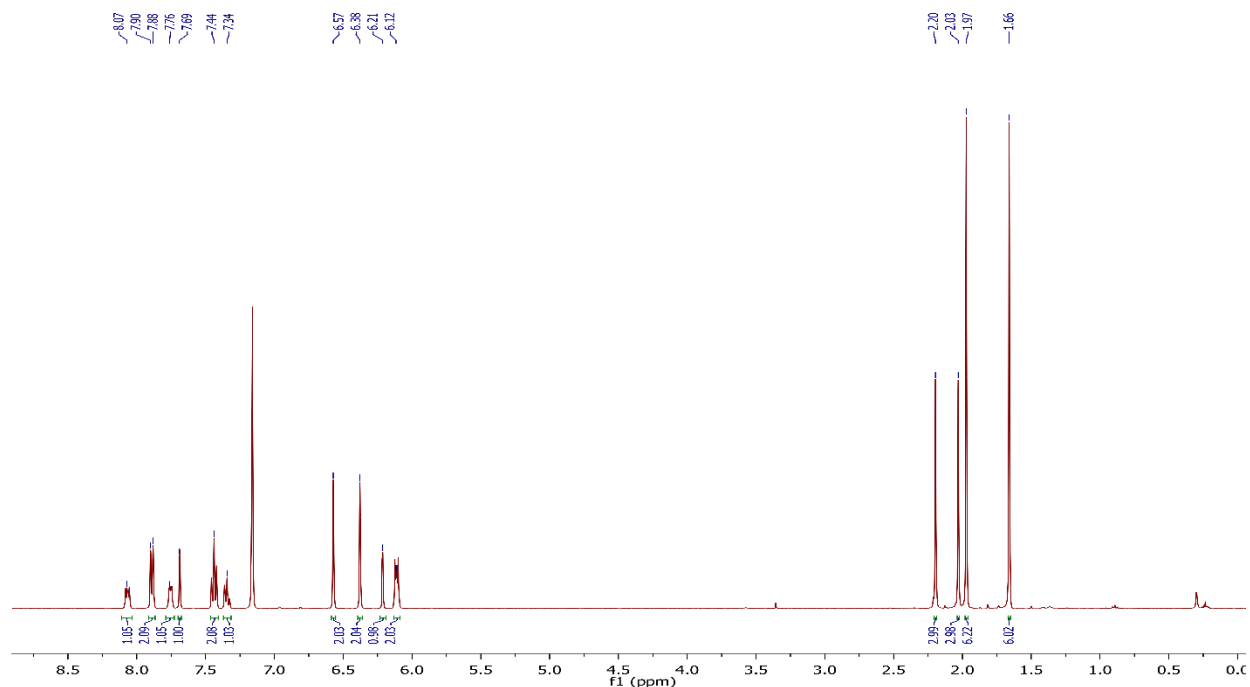

Figure S23: <sup>1</sup>H NMR spectrum of 9 in C<sub>6</sub>D<sub>6</sub>

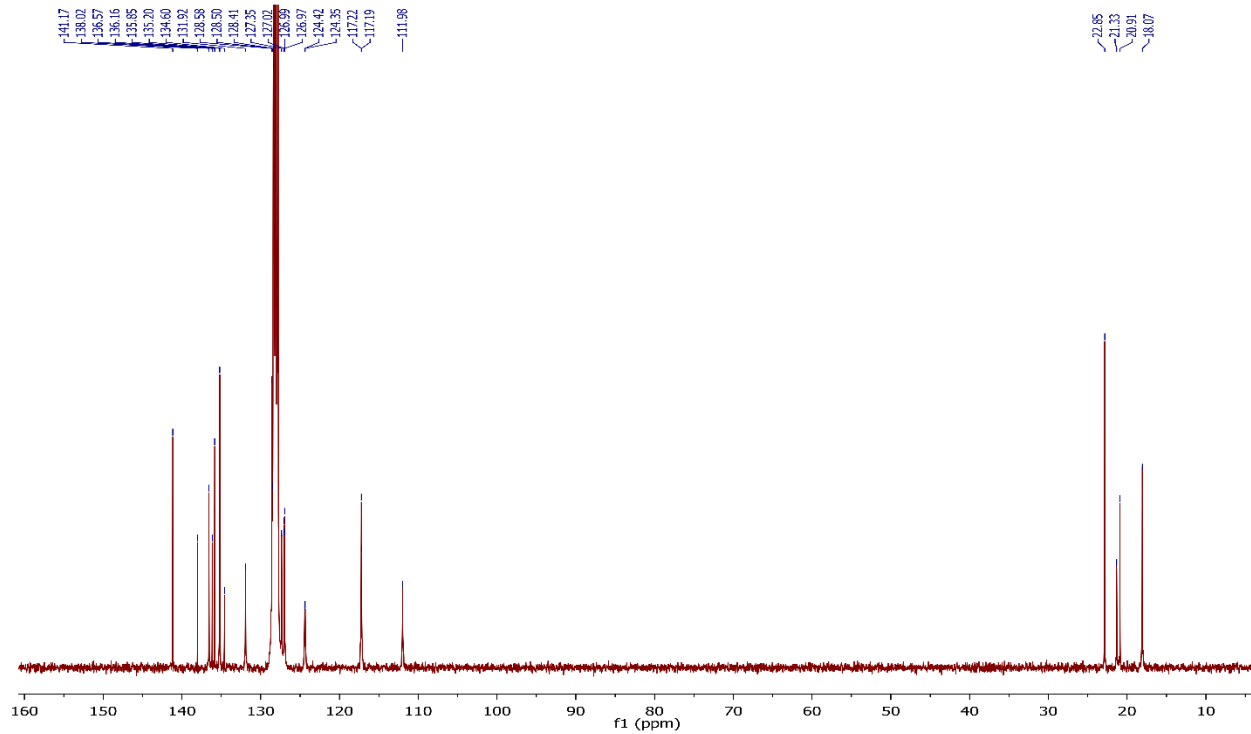

**Figure S24:**  $^{13}\text{C}\{^1\text{H}\}$  NMR spectrum of **9** in  $\text{C}_6\text{D}_6$

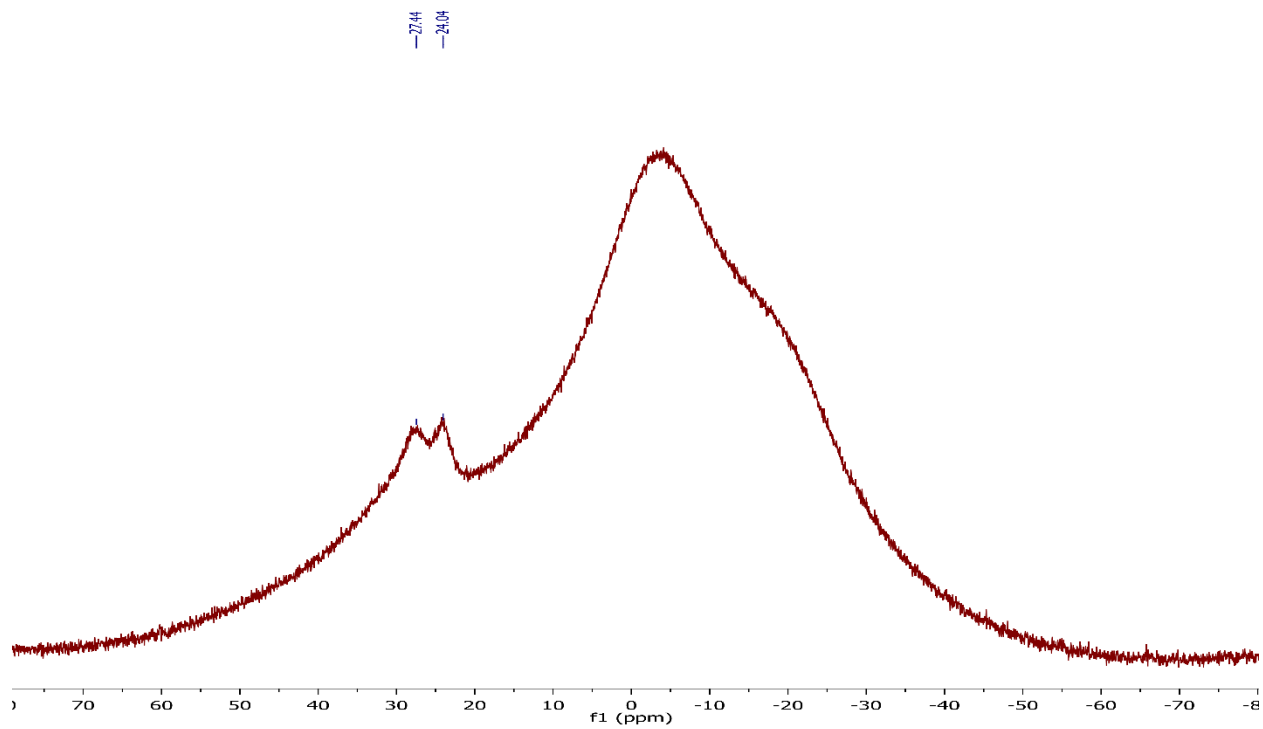

**Figure S25:**  $^{11}\text{B}\{^1\text{H}\}$  NMR spectrum of **9** in  $\text{C}_6\text{D}_6$

## Synthesis of 10

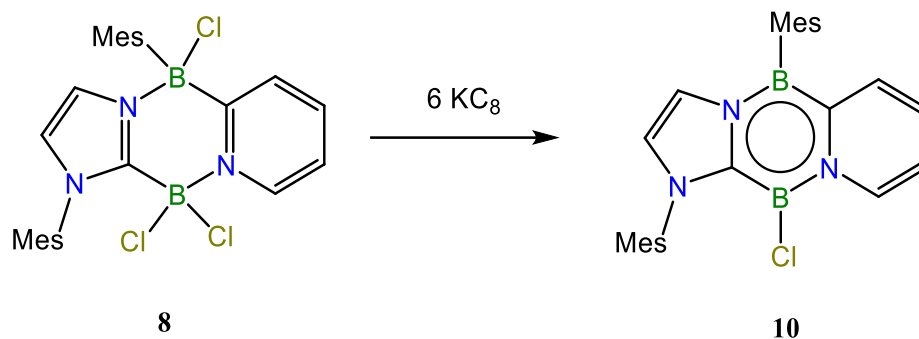

Potassium graphite (79 mg, 0.59 mmol) was added to a solution of **8** (50 mg, 0.1 mmol) in 5 mL benzene and stirred for 30 mins. The reaction mixture was then filtered and dried under vacuum to afford **10** as a red powder (23 mg, 54%).

**$^1\text{H}$  NMR (400.1 MHz,  $\text{C}_6\text{D}_6$ ):**  $\delta$  = 8.48 (d, 1H,  $^3J = 7.5$  Hz,  $\text{CH}_{\text{Py}}$ ), 7.6 (d, 1H,  $^3J = 8.5$  Hz,  $\text{CH}_{\text{Py}}$ ), 7.07 (d, 1H,  $^3J = 1.8$  Hz,  $\text{CH}_{\text{Imidaz}}$ ), 7.0 (s, 2H,  $\text{CH}_{\text{Mes}}$ ), 6.7 (s, 2H,  $\text{CH}_{\text{Mes}}$ ), 6.3 (ddd, 1H,  $^3J = 7.5$  Hz,  $^4J = 1.5$  Hz,  $\text{CH}_{\text{Py}}$ ), 6.18 (d, 1H,  $^3J = 1.8$  Hz,  $\text{CH}_{\text{Imidaz}}$ ), 6.07 – 6.01 (m, 1H,  $\text{CH}_{\text{Py}}$ ), 2.37 (s, 3H,  $\text{CH}_3\text{-Mes}$ ), 2.21 (s, 6H,  $\text{CH}_3\text{-Mes}$ ), 2.12 (s, 3H,  $\text{CH}_3\text{-Mes}$ ), 1.76 (s, 6H,  $\text{CH}_3\text{-Mes}$ ) ppm.

**$^{13}\text{C}\{^1\text{H}\}$  NMR (100.6 MHz,  $\text{C}_6\text{D}_6$ ):**  $\delta$  = 141.88 (*q*-Mes), 138.86 (*q*-Mes), 137.36 (*q*-Mes), 136.49 (*q*-Mes), 136.07 ( $\text{CH}_{\text{Py}}$ ), 135.13 (*q*-Mes), 129.41 ( $\text{CH}_{\text{Py}}$ ), 128.94 ( $\text{CH}_{\text{Mes}}$ ), 127.91 ( $\text{CH}_{\text{Mes}}$ ), 124.66 ( $\text{CH}_{\text{Mes}}$ ), 124.62 ( $\text{CH}_{\text{Mes}}$ ), 118.10 ( $\text{CH}_{\text{Py}}$ ), 117.07 ( $\text{CH}_{\text{Imidaz}}$ ), 111.39 ( $\text{CH}_{\text{Py}}$ ), 34.95 ( $\text{CH}_3\text{-Mes}$ ), 25.61 ( $\text{CH}_3\text{-Mes}$ ), 22.69 ( $\text{CH}_3\text{-Mes}$ ), 21.47 ( $\text{CH}_3\text{-Mes}$ ), 21.10 ( $\text{CH}_3\text{-Mes}$ ), 17.30 ( $\text{CH}_3\text{-Mes}$ ) ppm. Note: The signals for B-bound C atoms could not be identified due to quadrupolar broadening.

**$^{11}\text{B}\{^1\text{H}\}$  NMR (128.4 MHz,  $\text{C}_6\text{D}_6$ ):**  $\delta$  = 27.9, 18.8 ppm.

**MP:** 155 °C (decomp)



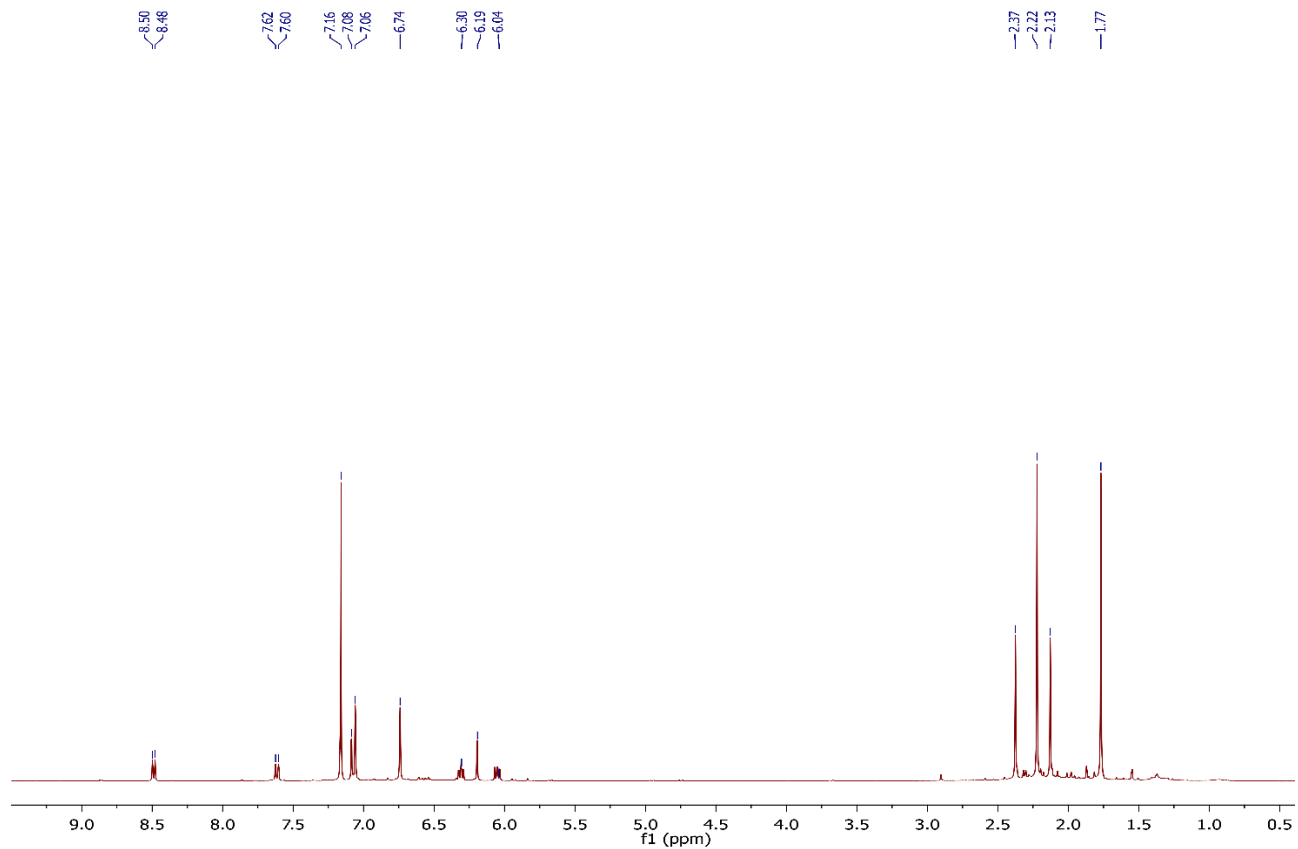

**Figure S26:**  $^1\text{H}$  NMR spectrum of **10** in  $\text{C}_6\text{D}_6$

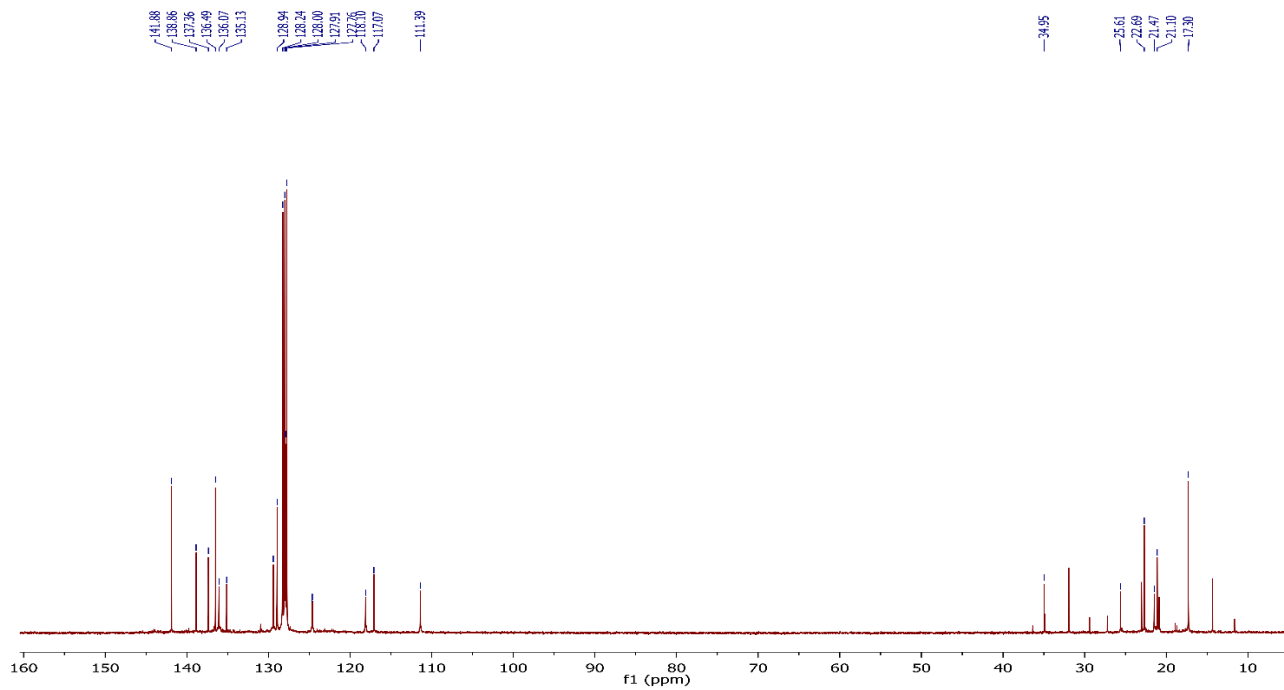

**Figure S27:**  $^{13}\text{C}\{^1\text{H}\}$  NMR spectrum of **10** in  $\text{C}_6\text{D}_6$

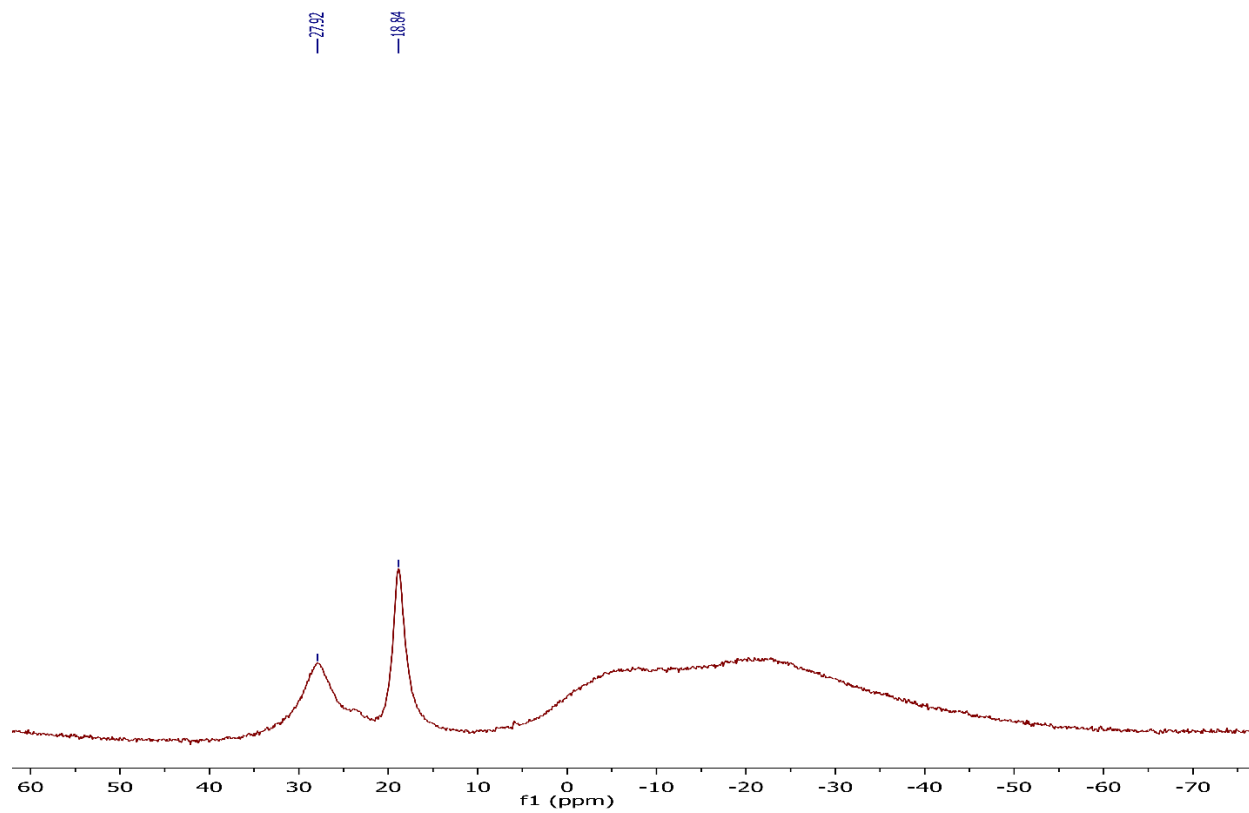

**Figure S28:**  $^{11}\text{B}\{^1\text{H}\}$  NMR spectrum of **10** in  $\text{C}_6\text{D}_6$

## 2.) Cyclic Voltammetry

Cyclic voltammetry experiments were performed in a nitrogen filled glovebox using Ossila Potentiostat. A standard 3-electrode cell configuration was employed using a platinum disk working electrode, platinum wire counter electrode and pseudo-reference electrode. Redox potentials were referenced by using ferrocene as an internal standard. The measurements were carried out in dry degassed THF with tetra-*n*-butylammonium tetrafluoroborate ( $[n\text{Bu}_4\text{N}][\text{BF}_4]$ ) as the supporting electrolyte with a scan rate of 50 mV/s at room temperature.

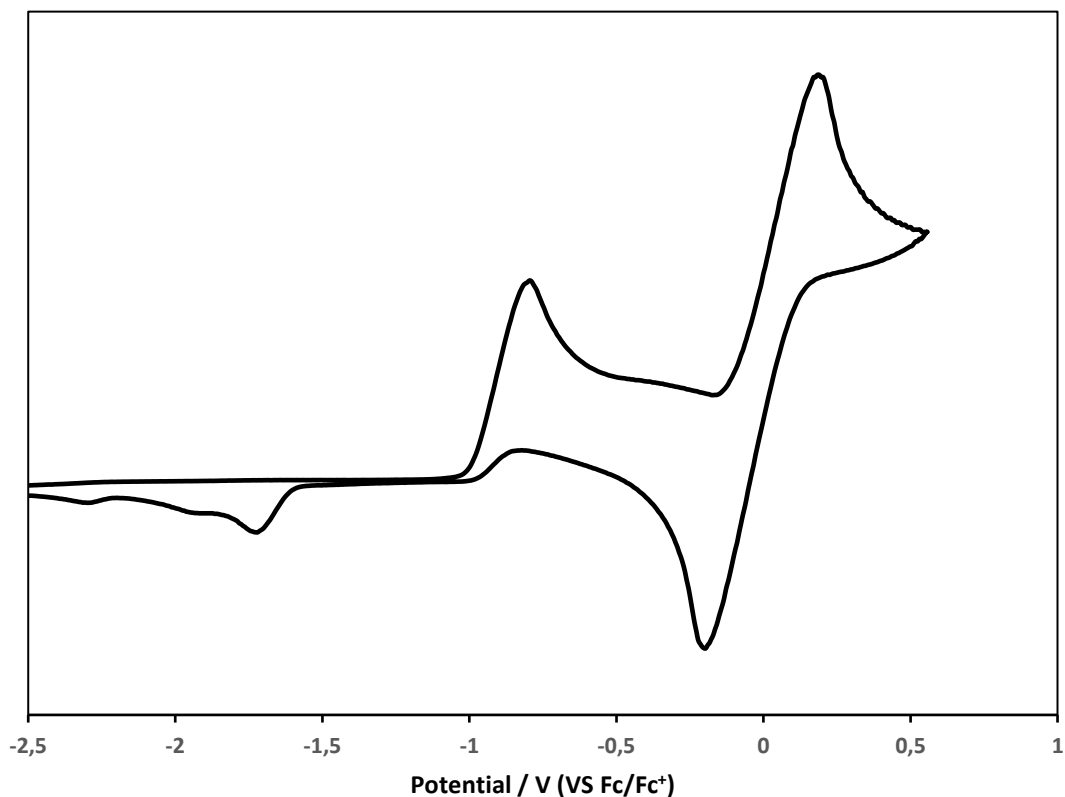

**Figure S29:** Cyclic voltammogram of **4** in THF/0.1 M  $[n\text{Bu}_4\text{N}][\text{BF}_4]$  measured at 50 mV/s. Ferrocene used as the internal standard.

### 3.) UV-Visible and Fluorescence spectrum

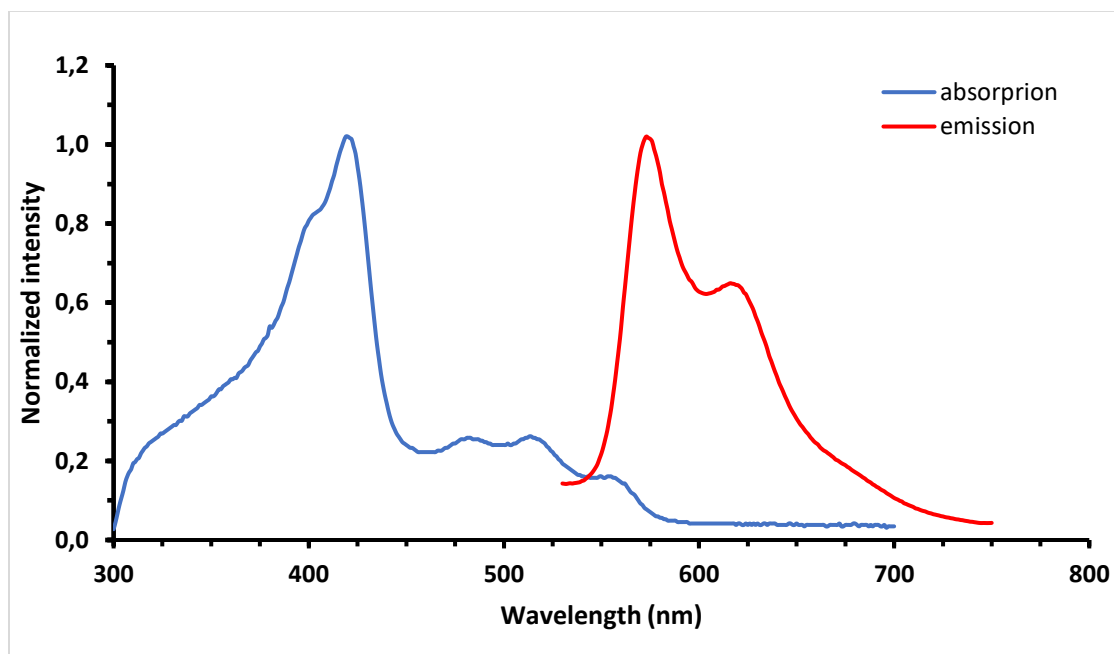

**Figure S30:** UV-Vis absorption and fluorescent emission spectrum of **3** in toluene. ( $\lambda_{\text{ex}}=420$  nm)

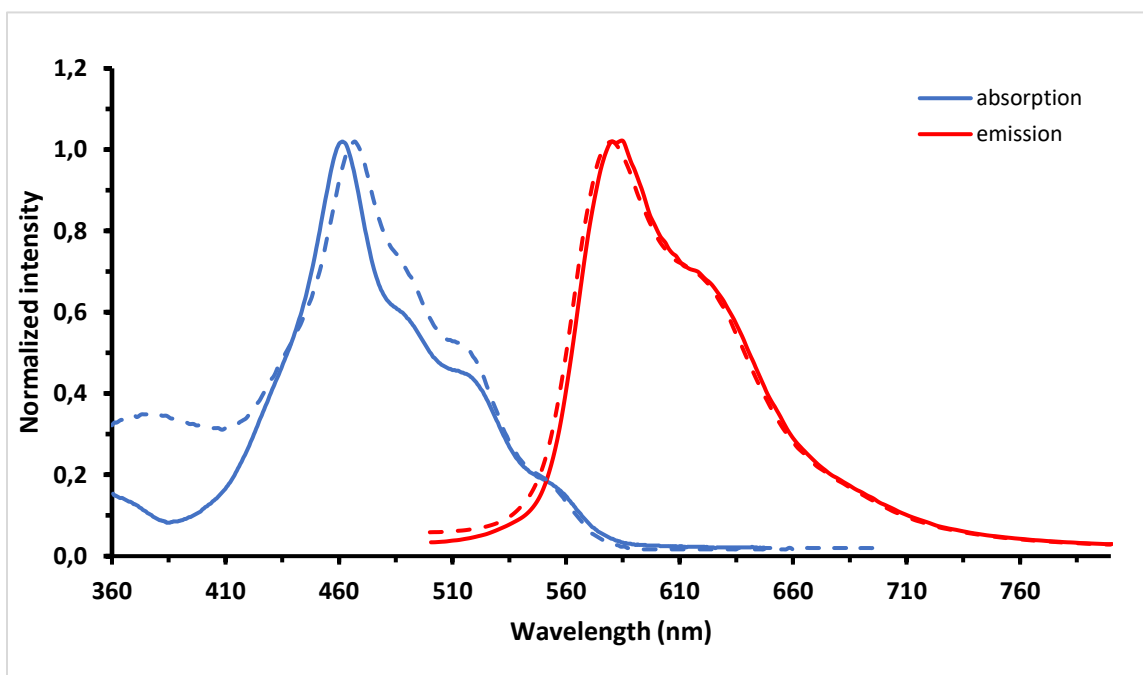

**Figure S31:** UV-Vis absorption and fluorescent emission spectrum of **9** (dotted line) and **10** (solid line) in benzene. ( $\lambda_{\text{ex}}=462$  nm for **9**,  $\lambda_{\text{ex}}=468$  nm for **10**)

## 4.) Crystallographic Details

Crystals were coated in Paratone-N oil in a glovebox, mounted on a MiTegen Micromount, and placed under a N<sub>2</sub> stream, thus maintaining a dry, O<sub>2</sub>-free environment for each crystal. The data were collected on Bruker Apex DUO diffractometer except for the structures **7** and **9** which were collected on Bruker D8 QUEST ECO diffractometer using a graphite monochromator with Mo K  $\alpha$  ( $\lambda = 0.71073 \text{ \AA}$ ) radiation. The data were collected at 100(2) K for all crystals. The frames were integrated with the Bruker SAINT software package using a narrow-frame algorithm. Data were corrected for absorption effects using the empirical multiscan method SADABS. The remaining non-hydrogen atoms were located from successive difference Fourier map calculations. The refinements were carried out by using full-matrix least squares techniques. In the final cycles of each refinement, all nonhydrogen atoms were assigned anisotropic temperature factors in the absence of positional disordering. C-H atom positions were calculated and allowed to ride on the carbon to which they are bonded assuming a C-H bond length of 0.95  $\text{\AA}$ . H-atom temperature factors were fixed at 1.20 times the isotropic temperature factor of the C-atom to which they are bonded. The H-atom contributions were calculated, but not refined. The locations of the largest peaks in the final difference Fourier map calculation as well as the magnitude of the residual electron densities in each case were of no chemical significance. Specific details can be found in the cif files.

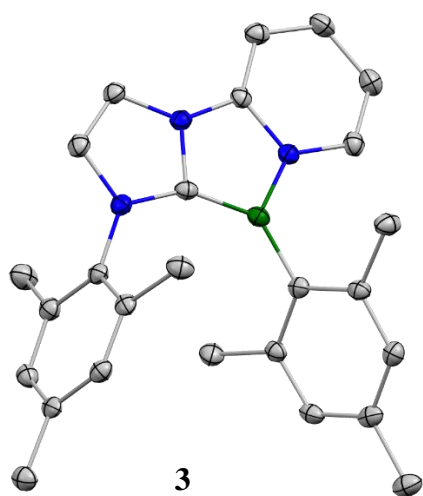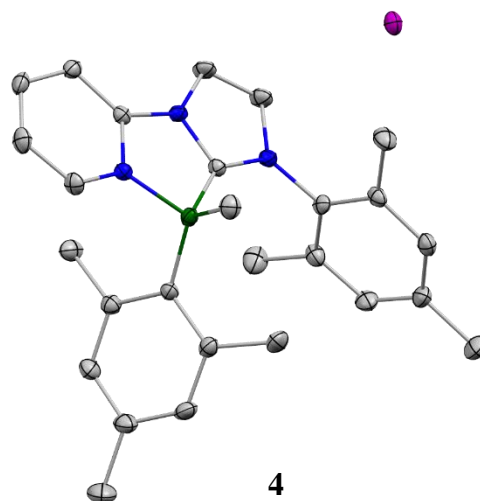

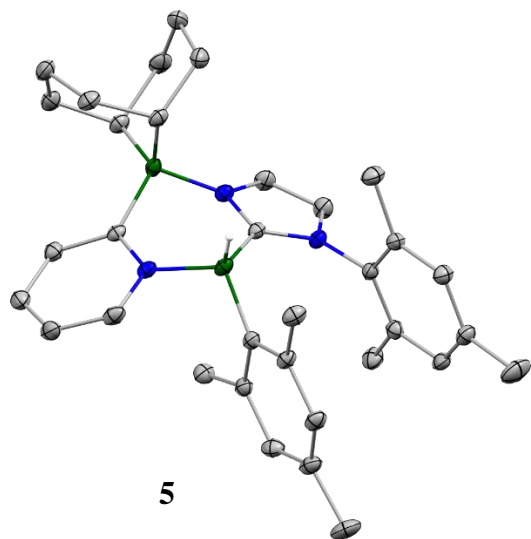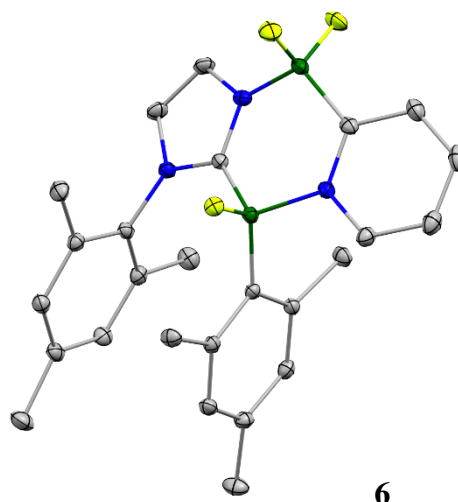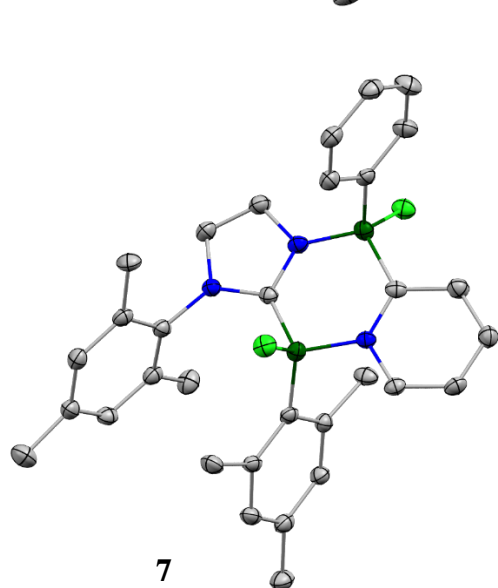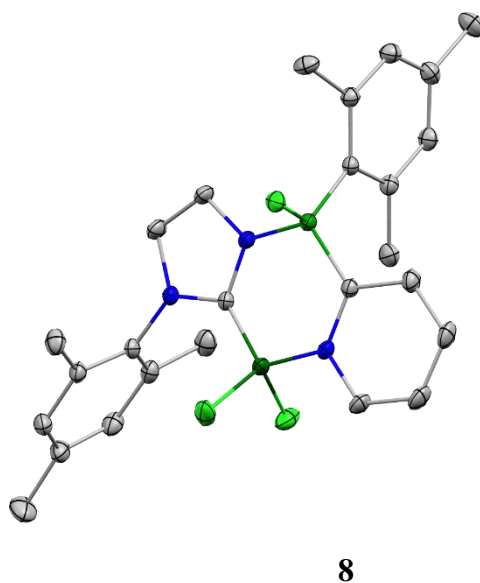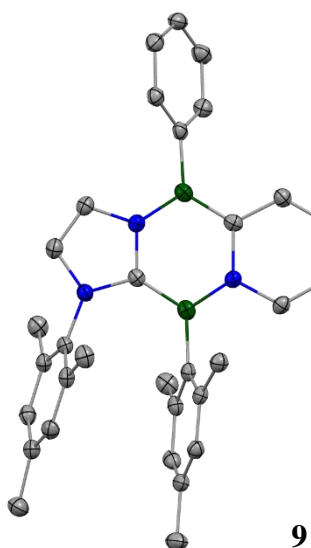

**Figure S32:** Molecular structures of compounds 3-9. Thermal ellipsoids are drawn at 50% probability. Carbon-bound hydrogen atoms are omitted for clarity. Element colors: carbon; grey, nitrogen; blue, boron; forest green, chlorine, light green, fluorine; yellow-green, iodine; purple, hydrogen; white.

**Table S1:** Crystal data and structure refinement

|                                                             | <b>3</b>                                         | <b>4</b>                                          | <b>5</b>                                                      |
|-------------------------------------------------------------|--------------------------------------------------|---------------------------------------------------|---------------------------------------------------------------|
| <b>CCDC#</b>                                                | 2331652                                          | 2331655                                           | 2331653                                                       |
| <b>Formula</b>                                              | C <sub>26</sub> H <sub>28</sub> N <sub>3</sub> B | C <sub>27</sub> H <sub>31</sub> N <sub>3</sub> BI | C <sub>34</sub> H <sub>43</sub> N <sub>3</sub> B <sub>2</sub> |
| <b>Wt</b>                                                   | 393.32                                           | 535.26                                            | 515.33                                                        |
| <b>Crystal system</b>                                       | Monoclinic                                       | Monoclinic                                        | monoclinic                                                    |
| <b>Space group</b>                                          | P 2 <sub>1</sub> /c                              | P 2 <sub>1</sub> /c                               | P 2 <sub>1</sub> /n                                           |
| <b>a(Å)</b>                                                 | 8.4111(6)                                        | 8.0398(6)                                         | 11.6929(6)                                                    |
| <b>b(Å)</b>                                                 | 15.3474(11)                                      | 28.378(2)                                         | 17.5821(9)                                                    |
| <b>c(Å)</b>                                                 | 17.0335(13)                                      | 11.9315(9)                                        | 14.6284(8)                                                    |
| <b>α(deg)</b>                                               | 90                                               | 90                                                | 90                                                            |
| <b>β(deg)</b>                                               | 96.326(2)                                        | 108.797(2)                                        | 104.319(2)                                                    |
| <b>γ(deg)</b>                                               | 90                                               | 90                                                | 90                                                            |
| <b>V(Å<sup>3</sup>)</b>                                     | 2185.4(3)                                        | 2577.1(3)                                         | 2914.0(3)                                                     |
| <b>Z</b>                                                    | 4                                                | 4                                                 | 4                                                             |
| <b>d(calc) gcm<sup>-1</sup></b>                             | 1.195                                            | 1.380                                             | 1.175                                                         |
| <b>R(int)</b>                                               | 0.0523                                           | 0.0646                                            | 0.0676                                                        |
| <b>Total data</b>                                           | 36951                                            | 82821                                             | 44958                                                         |
| <b>μ, mm<sup>-1</sup></b>                                   | 0.070                                            | 1.261                                             | 0.067                                                         |
| <b>&gt;2σ(Fo<sup>2</sup>)</b>                               | 5213                                             | 7912                                              | 8946                                                          |
| <b>Parameters</b>                                           | 277                                              | 296                                               | 361                                                           |
| <b>R1 (&gt;2σ)</b>                                          | 0.0523                                           | 0.0350                                            | 0.0550                                                        |
| <b>R<sub>w</sub></b>                                        | 0.1208                                           | 0.0666                                            | 0.1201                                                        |
| <b>GOOF</b>                                                 | 1.019                                            | 1.072                                             | 1.009                                                         |
| <b>Δρ<sub>max</sub>, Δρ<sub>min</sub> (eÅ<sup>-3</sup>)</b> | 0.31, -0.23                                      | 0.85, -1.34                                       | 0.36, -0.26                                                   |

**Table S2:** Crystal data and structure refinement

|                                                             | <b>6</b>                                                                     | <b>7</b>                                                                      | <b>8</b>                                                                      | <b>9</b>                                                      |
|-------------------------------------------------------------|------------------------------------------------------------------------------|-------------------------------------------------------------------------------|-------------------------------------------------------------------------------|---------------------------------------------------------------|
| <b>CCDC#</b>                                                | 2331654                                                                      | 2331660                                                                       | 2331659                                                                       | 2331656                                                       |
| <b>Formula</b>                                              | C <sub>26</sub> H <sub>28</sub> N <sub>3</sub> F <sub>3</sub> B <sub>2</sub> | C <sub>32</sub> H <sub>33</sub> B <sub>2</sub> Cl <sub>2</sub> N <sub>3</sub> | C <sub>26</sub> H <sub>28</sub> B <sub>2</sub> Cl <sub>3</sub> N <sub>3</sub> | C <sub>32</sub> H <sub>33</sub> B <sub>2</sub> N <sub>3</sub> |
| <b>Wt</b>                                                   | 461.13                                                                       | 552.13                                                                        | 510.48                                                                        | 481.23                                                        |
| <b>Crystal system</b>                                       | orthorhombic                                                                 | triclinic                                                                     | monoclinic                                                                    | triclinic                                                     |
| <b>Space group</b>                                          | P c a 21                                                                     | P -1                                                                          | P 2 <sub>1</sub> /c                                                           | P -1                                                          |
| <b>a(Å)</b>                                                 | 13.4867(18)                                                                  | 8.2484(7)                                                                     | 15.6649(12)                                                                   | 8.9434(6)                                                     |
| <b>b(Å)</b>                                                 | 12.7379(17)                                                                  | 8.6731(8)                                                                     | 11.3864(9)                                                                    | 12.0020(8)                                                    |
| <b>c(Å)</b>                                                 | 13.3863(18)                                                                  | 22.3744(19)                                                                   | 15.8645(12)                                                                   | 13.5298(9)                                                    |
| <b>α(deg)</b>                                               | 90                                                                           | 81.768(2)                                                                     | 90                                                                            | 105.413(2)                                                    |
| <b>β(deg)</b>                                               | 90                                                                           | 85.754(2)                                                                     | 115.787(2)                                                                    | 90.951(2)                                                     |
| <b>γ(deg)</b>                                               | 90                                                                           | 62.036(2)                                                                     | 90                                                                            | 109.556(2)                                                    |
| <b>V(Å<sup>3</sup>)</b>                                     | 2299.7(5)                                                                    | 1399.1(2)                                                                     | 2547.9(3)                                                                     | 1310.34(15)                                                   |
| <b>Z</b>                                                    | 4                                                                            | 2                                                                             | 4                                                                             | 2                                                             |
| <b>d(calc) gcm<sup>-1</sup></b>                             | 1.332                                                                        | 1.311                                                                         | 1.331                                                                         | 1.220                                                         |
| <b>R(int)</b>                                               | 0.0320                                                                       | 0.0548                                                                        | 0.0284                                                                        | 0.0503                                                        |
| <b>Total data</b>                                           | 43912                                                                        | 27539                                                                         | 50528                                                                         | 31471                                                         |
| <b>μ, mm<sup>-1</sup></b>                                   | 0.094                                                                        | 0.260                                                                         | 0.380                                                                         | 0.070                                                         |
| <b>&gt;2σ(Fo<sup>2</sup>)</b>                               | 6817                                                                         | 5714                                                                          | 7706                                                                          | 5543                                                          |
| <b>Parameters</b>                                           | 313                                                                          | 358                                                                           | 313                                                                           | 341                                                           |
| <b>R1 (&gt;2σ)</b>                                          | 0.0335                                                                       | 0.0667                                                                        | 0.0508                                                                        | 0.0550                                                        |
| <b>R<sub>w</sub></b>                                        | 0.0823                                                                       | 0.1542                                                                        | 0.1294                                                                        | 0.1285                                                        |
| <b>GOOF</b>                                                 | 1.020                                                                        | 1.114                                                                         | 1.057                                                                         | 1.061                                                         |
| <b>Δρ<sub>max</sub>, Δρ<sub>min</sub> (eÅ<sup>-3</sup>)</b> | 0.31, -0.21                                                                  | 0.73, -0.70                                                                   | 1.40, -0.49                                                                   | 0.28, -0.27                                                   |



## 5.) Density Functional Theory Calculations

All calculations were performed with Gaussian 16, Revision C.01<sup>7</sup>. Geometry optimization were carried out at PBE0-D3(BJ)<sup>8,9</sup>/6-311+G(d,p)<sup>10,11</sup> level of theory. Solvent effect in benzene was considered by the SMD solvation model.<sup>12</sup> Optimized geometries were characterized as either equilibrium structure (no imaginary frequencies) or transition state (one imaginary frequency) through vibrational frequency calculation at the same level of theory. Transition states were confirmed by intrinsic reaction coordinate (IRC) calculations to connect two corresponding intermediates. Mayer bond order analysis<sup>13</sup> was performed using Multiwfn 3.8<sup>14</sup> at the level of optimization. NICS<sup>15</sup> calculations were performed using the Gauge-Independent Atomic Orbital (GIAO) method at the level of optimization. Anisotropy of Current (Induced) Density (ACID)<sup>16</sup> calculation was performed by using the reported method at the level of optimization. TD-DFT calculation for **9** was performed at PBE0-D3(BJ)/6-311+G(d,p)|SMD(benzene) level of theory. For the reaction mechanism study, the mesityl groups were simplified to phenyl groups. Chemcraft<sup>17</sup> was used for visualizing optimized structures and rendering of molecular orbitals.

**Table S3:** NICS values for **2** and **3** calculated at PBE0-D3(BJ)/6-311+G(d,p)|SMD(benzene).

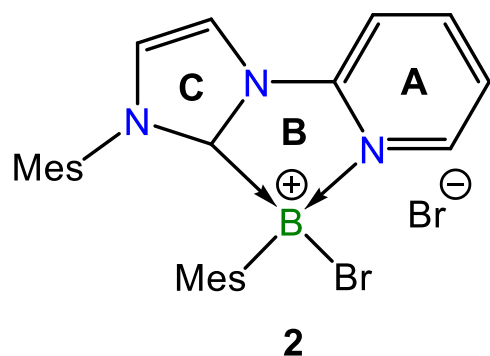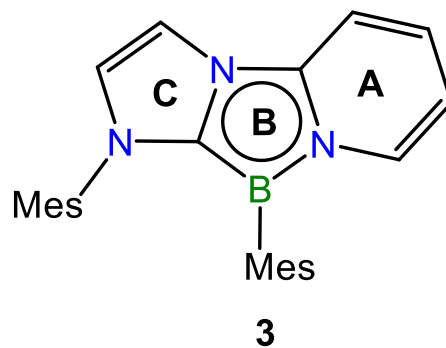

|          | NICS(0) | NICS(1) | NICS <sub>zz</sub> (1) |
|----------|---------|---------|------------------------|
| <b>A</b> | -6.9    | -8.7    | -22.7                  |
| <b>B</b> | 0.9     | -0.6    | 0.7                    |
| <b>C</b> | -10.0   | -7.5    | -20.2                  |

|          | NICS(0) | NICS(1) | NICS <sub>zz</sub> (1) |
|----------|---------|---------|------------------------|
| <b>A</b> | -4.8    | -6.0    | -15.6                  |
| <b>B</b> | -16.3   | -12.3   | -35.0                  |
| <b>C</b> | -10.4   | -6.4    | -19.8                  |

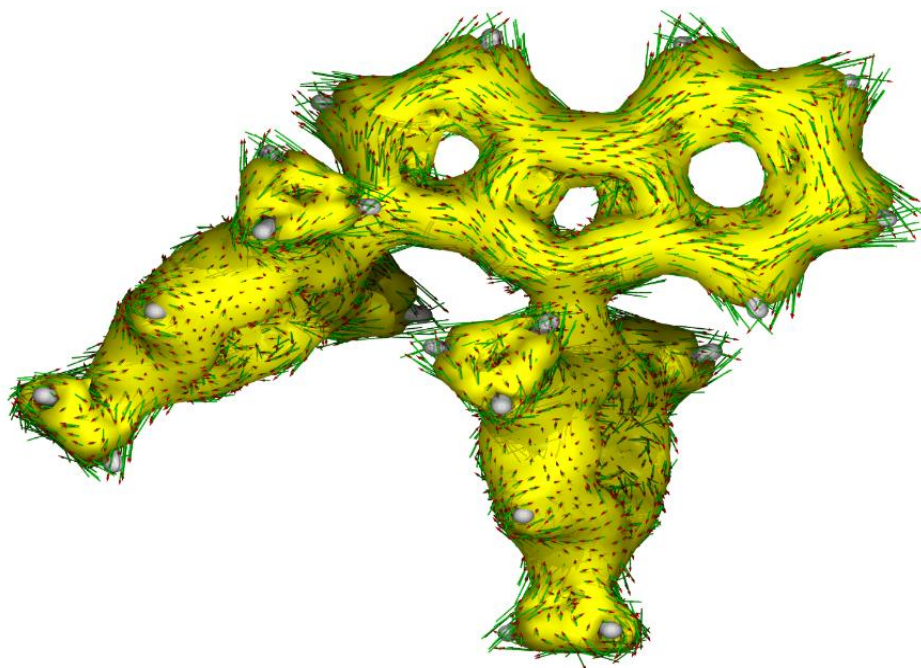

**Figure S33:** ACID isosurface of **3** plotted at an isosurface value of 0.032. Current density vectors are plotted onto the ACID isosurface indicating diatropic ring current. The magnetic field vector is orthogonal with respect to the ring plane and points toward the viewer. Current densities were calculated at PBE0-D3(BJ)/6-311+G(d,p)|SMD(benzene).

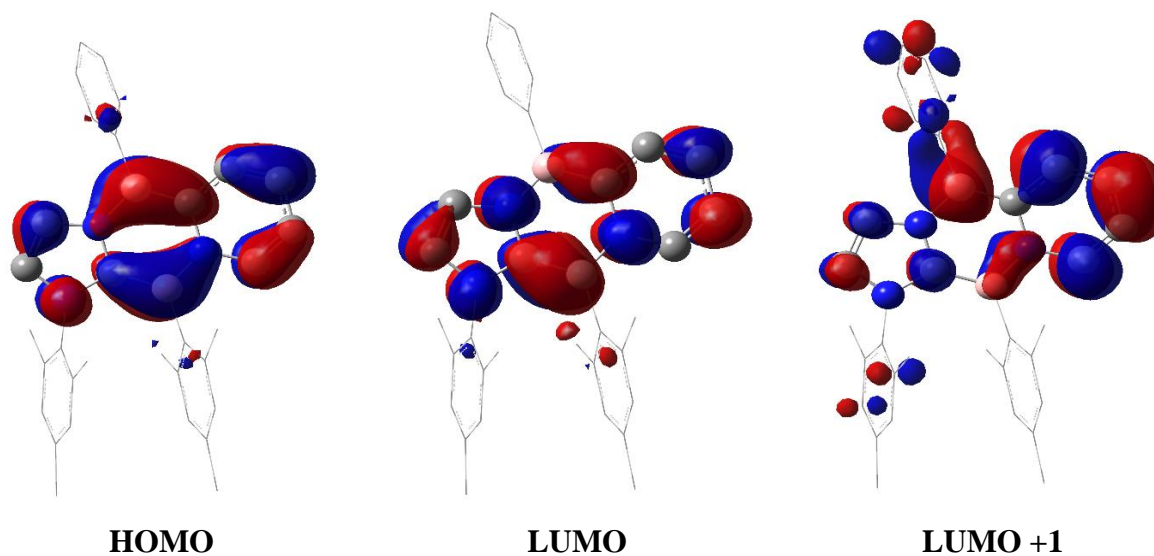

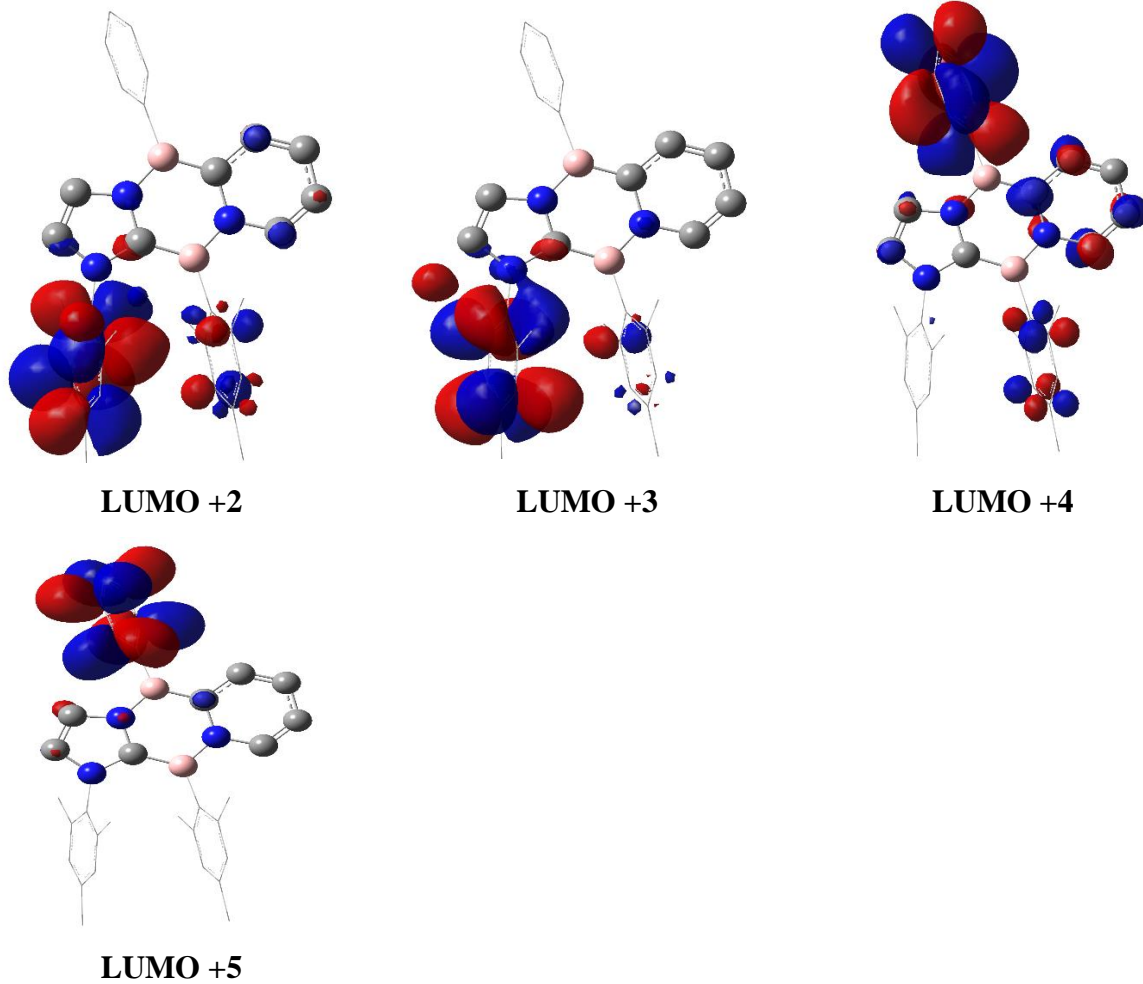

**Figure S34:** Plots of molecular orbitals of **9**. Hydrogen atoms are omitted for clarity.

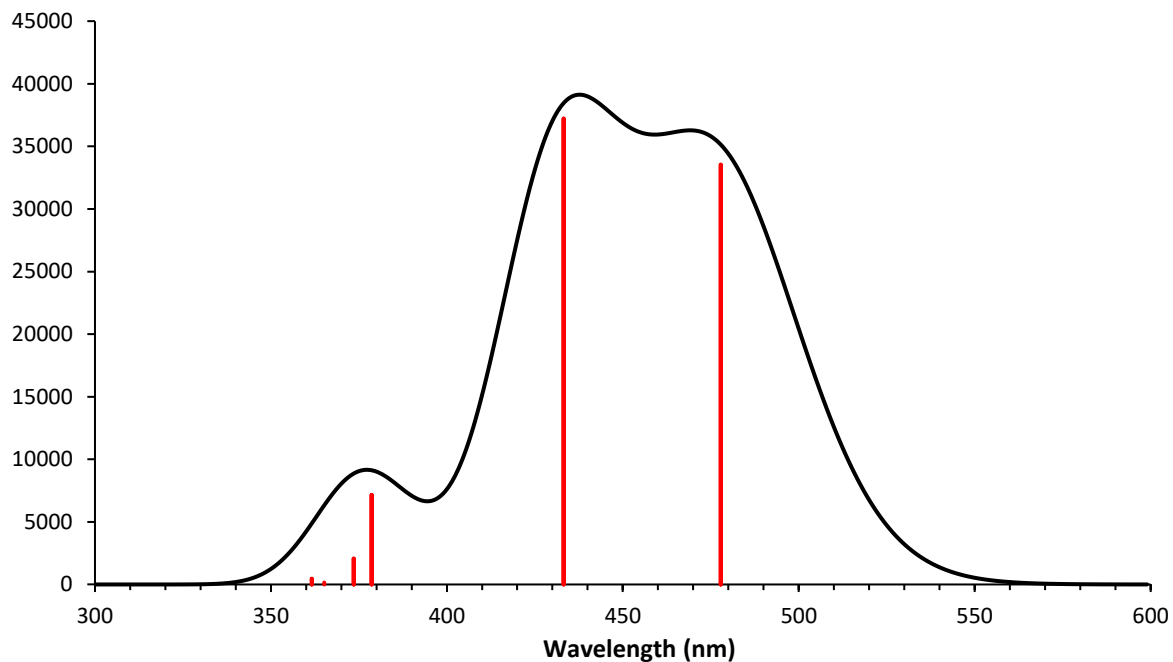

**Figure S35:** UV-Vis spectrum calculated at PBE0-D3(BJ)/6-311+G(d,p)|SMD(benzene).

**Table S4:** TD-DFT excitation energies calculated for **9**.

| Energy (eV) | Wavelength (nm) | Oscillator strength (f) | Contribution                                                                                   |
|-------------|-----------------|-------------------------|------------------------------------------------------------------------------------------------|
| 2.6         | 478             | 0.34                    | HOMO → LUMO (70.8%)<br>HOMO → LUMO+1 (28.0%)                                                   |
| 2.9         | 433             | 0.37                    | HOMO → LUMO (28.2%)<br>HOMO → LUMO+1 (66.4%)<br>HOMO → LUMO+4 (2.5%)                           |
| 3.3         | 378             | 0.07                    | HOMO → LUMO+1 (3.7%)<br>HOMO → LUMO+2 (51.7%)<br>HOMO → LUMO+4 (39.5%)<br>HOMO → LUMO+5 (2.8%) |
| 3.3         | 374             | 0.02                    | HOMO → LUMO+2 (46.0%)<br>HOMO → LUMO+4 (50.0%)<br>HOMO → LUMO+5 (2.2%)                         |

**Table S5:** Cartesian coordinates of optimized structures (PBE0-D3(BJ)/6-311+G(d,p)|SMD(benzene))

**Compound 2**

|    |              |              |              |
|----|--------------|--------------|--------------|
| Br | -6.314225000 | 0.324337000  | 2.948407000  |
| N  | 0.000000000  | 0.000000000  | -1.000000000 |
| C  | 1.146262000  | 0.014941000  | -1.678461000 |
| H  | 1.054077000  | 0.023860000  | -2.755888000 |
| B  | -1.498654000 | 0.056978000  | -1.628748000 |
| N  | -1.303979000 | -0.009321000 | 0.802693000  |
| C  | 2.351861000  | 0.011348000  | -1.016531000 |
| H  | 3.273298000  | 0.016878000  | -1.579079000 |
| N  | -3.399835000 | -0.024420000 | 0.373511000  |
| C  | 2.354545000  | 0.002896000  | 0.374108000  |
| H  | 3.292497000  | 0.001591000  | 0.913402000  |
| C  | 1.163520000  | 0.000000000  | 1.077473000  |
| H  | 1.131559000  | -0.000006000 | 2.156876000  |
| C  | 0.000000000  | 0.000000000  | 0.338896000  |
| C  | -2.212352000 | 0.012254000  | -0.194744000 |
| C  | -1.944800000 | -0.055261000 | 2.033366000  |
| H  | -1.422064000 | -0.072490000 | 2.971792000  |
| C  | -3.266552000 | -0.062769000 | 1.759569000  |
| H  | -4.174491000 | -0.051929000 | 2.387567000  |
| Br | -1.518671000 | 1.994727000  | -2.289373000 |
| C  | -1.826278000 | -1.137838000 | -2.656488000 |
| C  | -2.755194000 | -0.997801000 | -3.711580000 |
| C  | -2.956600000 | -2.046689000 | -4.602569000 |
| H  | -3.672787000 | -1.908855000 | -5.405424000 |
| C  | -2.303162000 | -3.260648000 | -4.490811000 |
| C  | -1.476680000 | -3.432565000 | -3.394531000 |
| H  | -1.017664000 | -4.401334000 | -3.228015000 |
| C  | -1.249049000 | -2.416617000 | -2.473875000 |
| C  | -4.634257000 | -0.003190000 | -0.372580000 |
| C  | -5.120907000 | -1.203928000 | -0.871564000 |
| C  | -6.270598000 | -1.147488000 | -1.644075000 |
| H  | -6.674187000 | -2.068980000 | -2.047659000 |
| C  | -6.924052000 | 0.051895000  | -1.892986000 |

|   |              |              |              |
|---|--------------|--------------|--------------|
| C | -6.412424000 | 1.218732000  | -1.342204000 |
| H | -6.931070000 | 2.156463000  | -1.503762000 |
| C | -5.266008000 | 1.219264000  | -0.562772000 |
| C | -3.626483000 | 0.215149000  | -3.924535000 |
| H | -4.494829000 | -0.065856000 | -4.519667000 |
| H | -3.098466000 | 1.007980000  | -4.454206000 |
| H | -3.996768000 | 0.631215000  | -2.989885000 |
| C | -2.506979000 | -4.354322000 | -5.498945000 |
| H | -3.520249000 | -4.337662000 | -5.901595000 |
| H | -2.327105000 | -5.337062000 | -5.062075000 |
| H | -1.818186000 | -4.234730000 | -6.339038000 |
| C | -0.453404000 | -2.823858000 | -1.250821000 |
| H | -0.904233000 | -2.455932000 | -0.327486000 |
| H | 0.588370000  | -2.498575000 | -1.276875000 |
| H | -0.440032000 | -3.909865000 | -1.172893000 |
| C | -4.457672000 | -2.512433000 | -0.556503000 |
| H | -4.397108000 | -2.660021000 | 0.524002000  |
| H | -3.449361000 | -2.563701000 | -0.971495000 |
| H | -5.028810000 | -3.338385000 | -0.976513000 |
| C | -8.193931000 | 0.080680000  | -2.694734000 |
| H | -9.059273000 | 0.018981000  | -2.030671000 |
| H | -8.246535000 | -0.759059000 | -3.388193000 |
| H | -8.281644000 | 1.005680000  | -3.265505000 |
| C | -4.773720000 | 2.466091000  | 0.104278000  |
| H | -5.283778000 | 3.341629000  | -0.293715000 |
| H | -3.699713000 | 2.609129000  | -0.031565000 |
| H | -4.993435000 | 2.395060000  | 1.174749000  |

### Compound 3

|   |              |              |              |
|---|--------------|--------------|--------------|
| 7 | -2.706971000 | 0.019379000  | -0.211470000 |
| 6 | -3.112965000 | -1.306615000 | -0.027346000 |
| 5 | -1.252314000 | 0.181779000  | -0.127962000 |
| 7 | -1.988555000 | -2.028834000 | 0.167171000  |
| 6 | -4.446542000 | -1.694164000 | -0.067154000 |
| 1 | -4.701790000 | -2.737281000 | 0.083622000  |
| 7 | 0.207364000  | -2.100994000 | 0.334918000  |
| 6 | -5.410442000 | -0.738119000 | -0.299250000 |

|   |              |              |              |
|---|--------------|--------------|--------------|
| 1 | -6.458414000 | -1.009284000 | -0.334468000 |
| 6 | -5.004674000 | 0.606992000  | -0.501536000 |
| 1 | -5.738426000 | 1.379315000  | -0.700834000 |
| 6 | -3.689113000 | 0.952506000  | -0.459079000 |
| 1 | -3.334712000 | 1.961333000  | -0.628405000 |
| 6 | -0.847707000 | -1.231854000 | 0.112297000  |
| 6 | -0.288660000 | -3.374846000 | 0.508721000  |
| 1 | 0.367667000  | -4.208224000 | 0.703110000  |
| 6 | -1.640614000 | -3.353819000 | 0.412459000  |
| 1 | -2.362412000 | -4.147091000 | 0.506753000  |
| 6 | -0.498507000 | 1.549911000  | -0.209708000 |
| 6 | 0.423388000  | 1.820487000  | -1.244104000 |
| 6 | 1.097277000  | 3.037405000  | -1.280817000 |
| 1 | 1.800712000  | 3.228074000  | -2.088963000 |
| 6 | 0.893777000  | 4.019074000  | -0.311451000 |
| 6 | -0.012042000 | 3.749533000  | 0.707838000  |
| 1 | -0.179970000 | 4.496980000  | 1.480403000  |
| 6 | -0.706362000 | 2.539579000  | 0.771563000  |
| 6 | 1.579911000  | -1.734171000 | 0.317569000  |
| 6 | 2.083300000  | -0.918333000 | 1.338122000  |
| 6 | 3.423085000  | -0.545032000 | 1.277785000  |
| 1 | 3.822036000  | 0.091077000  | 2.063626000  |
| 6 | 4.260437000  | -0.965548000 | 0.247144000  |
| 6 | 3.727780000  | -1.786416000 | -0.743704000 |
| 1 | 4.363503000  | -2.118619000 | -1.560404000 |
| 6 | 2.390302000  | -2.176180000 | -0.734872000 |
| 6 | 0.704601000  | 0.799580000  | -2.309601000 |
| 1 | -0.208426000 | 0.280817000  | -2.615611000 |
| 1 | 1.401766000  | 0.037903000  | -1.944365000 |
| 1 | 1.154997000  | 1.263006000  | -3.191846000 |
| 6 | 1.633808000  | 5.323172000  | -0.375097000 |
| 1 | 2.717501000  | 5.165341000  | -0.383752000 |
| 1 | 1.393837000  | 5.959689000  | 0.480220000  |
| 1 | 1.381924000  | 5.877561000  | -1.285811000 |
| 6 | -1.664754000 | 2.315856000  | 1.908081000  |
| 1 | -2.687833000 | 2.602435000  | 1.636354000  |
| 1 | -1.384712000 | 2.909634000  | 2.782568000  |

|   |              |              |              |
|---|--------------|--------------|--------------|
| 1 | -1.699982000 | 1.262005000  | 2.199728000  |
| 6 | 1.212074000  | -0.449501000 | 2.461437000  |
| 1 | 0.562880000  | 0.367507000  | 2.131826000  |
| 1 | 1.820168000  | -0.084766000 | 3.291934000  |
| 1 | 0.563918000  | -1.250051000 | 2.828264000  |
| 6 | 5.689615000  | -0.514080000 | 0.188388000  |
| 1 | 6.306705000  | -1.211152000 | -0.383927000 |
| 1 | 6.119494000  | -0.418172000 | 1.189034000  |
| 1 | 5.765933000  | 0.467008000  | -0.294346000 |
| 6 | 1.837901000  | -3.019930000 | -1.845091000 |
| 1 | 1.734011000  | -4.068925000 | -1.546926000 |
| 1 | 2.500757000  | -2.990343000 | -2.712493000 |
| 1 | 0.848333000  | -2.674475000 | -2.155374000 |

### Compound 9

|   |              |              |              |
|---|--------------|--------------|--------------|
| 7 | -1.165772000 | 1.774993000  | -0.299470000 |
| 7 | -1.876492000 | -0.940614000 | 0.160935000  |
| 7 | 0.161914000  | -1.754137000 | 0.278535000  |
| 6 | -2.535385000 | 1.424845000  | -0.251749000 |
| 6 | -0.552849000 | -0.590627000 | 0.100002000  |
| 6 | 1.415455000  | 1.288753000  | -0.035667000 |
| 6 | 1.575833000  | -1.890587000 | 0.134991000  |
| 6 | -4.444745000 | -0.494941000 | 0.082812000  |
| 6 | -0.840121000 | 3.112825000  | -0.527753000 |
| 1 | 0.218687000  | 3.318356000  | -0.571323000 |
| 6 | -4.941769000 | -1.090716000 | 1.246467000  |
| 1 | -4.292344000 | -1.195594000 | 2.109656000  |
| 6 | 2.412061000  | -1.601937000 | 1.208328000  |
| 6 | 1.919249000  | 1.795195000  | 1.175978000  |
| 6 | 3.274030000  | 2.058951000  | 1.310859000  |
| 1 | 3.650368000  | 2.429502000  | 2.259590000  |
| 6 | -1.965086000 | -2.310862000 | 0.371141000  |
| 1 | -2.913865000 | -2.809078000 | 0.448325000  |
| 6 | -1.762738000 | 4.077323000  | -0.686165000 |
| 1 | -1.427971000 | 5.091017000  | -0.860402000 |
| 6 | 2.295815000  | 1.152101000  | -1.113714000 |
| 6 | -3.148894000 | 3.760682000  | -0.623386000 |



|   |              |              |              |
|---|--------------|--------------|--------------|
| 1 | -3.898449000 | 4.531336000  | -0.737748000 |
| 6 | -3.489876000 | 2.467117000  | -0.412242000 |
| 1 | -4.531783000 | 2.181347000  | -0.349810000 |
| 6 | 4.163830000  | 1.851001000  | 0.263083000  |
| 6 | -5.325343000 | -0.372731000 | -0.995245000 |
| 1 | -4.974743000 | 0.083360000  | -1.914545000 |
| 6 | 0.990985000  | 2.085252000  | 2.326272000  |
| 1 | 1.543079000  | 2.250541000  | 3.251977000  |
| 1 | 0.280169000  | 1.273929000  | 2.490145000  |
| 1 | 0.399137000  | 2.982642000  | 2.125084000  |
| 6 | 3.454543000  | -2.318654000 | -1.269618000 |
| 1 | 3.860691000  | -2.597871000 | -2.235878000 |
| 6 | -0.711314000 | -2.796480000 | 0.438408000  |
| 1 | -0.358171000 | -3.802815000 | 0.581823000  |
| 6 | 3.782945000  | -1.641524000 | 0.992940000  |
| 1 | 4.445591000  | -1.380659000 | 1.810971000  |
| 6 | 3.650863000  | 1.422522000  | -0.948858000 |
| 1 | 4.322157000  | 1.282326000  | -1.790859000 |
| 6 | 2.078645000  | -2.281663000 | -1.106094000 |
| 6 | -6.636106000 | -0.820806000 | -0.918787000 |
| 1 | -7.294133000 | -0.713168000 | -1.772619000 |
| 6 | 1.803589000  | 0.752796000  | -2.478846000 |
| 1 | 2.480464000  | 0.040187000  | -2.952811000 |
| 1 | 1.738650000  | 1.629373000  | -3.128911000 |
| 1 | 0.809888000  | 0.307735000  | -2.436766000 |
| 6 | -6.250324000 | -1.540885000 | 1.332895000  |
| 1 | -6.607907000 | -1.991177000 | 2.251090000  |
| 6 | 4.320979000  | -1.973038000 | -0.240166000 |
| 6 | 1.159612000  | -2.648281000 | -2.236890000 |
| 1 | 1.696457000  | -2.646405000 | -3.184638000 |
| 1 | 0.321584000  | -1.955739000 | -2.317242000 |
| 1 | 0.739156000  | -3.646350000 | -2.092179000 |
| 6 | 1.878349000  | -1.266366000 | 2.570144000  |
| 1 | 2.448415000  | -0.448665000 | 3.010604000  |
| 1 | 1.964316000  | -2.131370000 | 3.232346000  |
| 1 | 0.831564000  | -0.973614000 | 2.539953000  |
| 6 | -7.103276000 | -1.407435000 | 0.247196000  |

|   |              |              |              |
|---|--------------|--------------|--------------|
| 1 | -8.126273000 | -1.757090000 | 0.310755000  |
| 6 | 5.639992000  | 2.058028000  | 0.454707000  |
| 1 | 6.087961000  | 1.193227000  | 0.952612000  |
| 1 | 5.844151000  | 2.932160000  | 1.075012000  |
| 1 | 6.150770000  | 2.190517000  | -0.499790000 |
| 6 | 5.802548000  | -1.903110000 | -0.473793000 |
| 1 | 6.361288000  | -2.107394000 | 0.440038000  |
| 1 | 6.078636000  | -0.900639000 | -0.812523000 |
| 1 | 6.122572000  | -2.611459000 | -1.238495000 |
| 5 | -0.098490000 | 0.833135000  | -0.112651000 |
| 5 | -2.956839000 | 0.016736000  | -0.006741000 |

### 3\_ph

|   |              |              |              |
|---|--------------|--------------|--------------|
| 7 | 2.268162000  | 0.057053000  | 0.022629000  |
| 6 | 2.514336000  | -1.316510000 | -0.013219000 |
| 5 | 0.827480000  | 0.366367000  | 0.038659000  |
| 7 | 1.312078000  | -1.928386000 | -0.029088000 |
| 6 | 3.800401000  | -1.855266000 | -0.013822000 |
| 1 | 3.928702000  | -2.932540000 | -0.046847000 |
| 7 | -0.893875000 | -1.805415000 | -0.015309000 |
| 6 | 4.878422000  | -0.998225000 | 0.030376000  |
| 1 | 5.891393000  | -1.384648000 | 0.026912000  |
| 6 | 4.637398000  | 0.401413000  | 0.090832000  |
| 1 | 5.463691000  | 1.101819000  | 0.146003000  |
| 6 | 3.364098000  | 0.890207000  | 0.089936000  |
| 1 | 3.138374000  | 1.947772000  | 0.152633000  |
| 6 | 0.255688000  | -1.015592000 | -0.002157000 |
| 6 | -0.518942000 | -3.136026000 | -0.041571000 |
| 1 | -1.251542000 | -3.925966000 | -0.093854000 |
| 6 | 0.832311000  | -3.231497000 | -0.050389000 |
| 1 | 1.471627000  | -4.098382000 | -0.086221000 |
| 6 | 0.249982000  | 1.817456000  | 0.099581000  |
| 6 | -0.763418000 | 2.165474000  | 1.011429000  |
| 6 | -1.285452000 | 3.455979000  | 1.069525000  |
| 1 | -2.067712000 | 3.690082000  | 1.787248000  |
| 6 | -0.803674000 | 4.446223000  | 0.214951000  |
| 6 | 0.198839000  | 4.130080000  | -0.701141000 |

|   |              |              |              |
|---|--------------|--------------|--------------|
| 1 | 0.575561000  | 4.890991000  | -1.380161000 |
| 6 | 0.712471000  | 2.836048000  | -0.755420000 |
| 6 | -2.220540000 | -1.349189000 | -0.087366000 |
| 6 | -2.515579000 | -0.142389000 | -0.728546000 |
| 6 | -3.835075000 | 0.291826000  | -0.807514000 |
| 1 | -4.051209000 | 1.232380000  | -1.306068000 |
| 6 | -4.869637000 | -0.467003000 | -0.264093000 |
| 6 | -4.570146000 | -1.668960000 | 0.376401000  |
| 1 | -5.363736000 | -2.264151000 | 0.819300000  |
| 6 | -3.254374000 | -2.107307000 | 0.476792000  |
| 1 | 1.475544000  | 2.606319000  | -1.496841000 |
| 1 | -1.206899000 | 5.454348000  | 0.260534000  |
| 1 | -1.146736000 | 1.408780000  | 1.691636000  |
| 1 | -1.715651000 | 0.444575000  | -1.165695000 |
| 1 | -5.897307000 | -0.123236000 | -0.331743000 |
| 1 | -3.028702000 | -3.023205000 | 1.014737000  |

### Int 1

|   |              |              |              |
|---|--------------|--------------|--------------|
| N | -1.597532000 | 0.840097000  | -0.420404000 |
| C | -2.317819000 | -0.432709000 | -0.335074000 |
| B | -0.190944000 | 0.719016000  | -0.286013000 |
| N | -1.231176000 | -1.384300000 | -0.452452000 |
| C | -3.415938000 | -0.542124000 | -1.327275000 |
| H | -3.767092000 | -1.530954000 | -1.600109000 |
| N | 0.871452000  | -1.830158000 | -0.253150000 |
| C | -4.033959000 | 0.576299000  | -1.731588000 |
| H | -4.904735000 | 0.519770000  | -2.375836000 |
| C | -3.530661000 | 1.875818000  | -1.336107000 |
| H | -4.076721000 | 2.776148000  | -1.587997000 |
| C | -2.335830000 | 1.975494000  | -0.729355000 |
| H | -1.848647000 | 2.920883000  | -0.528004000 |
| C | -0.020372000 | -0.819486000 | -0.330059000 |
| C | 0.193983000  | -3.028483000 | -0.337896000 |
| H | 0.709929000  | -3.973395000 | -0.292137000 |
| C | -1.135122000 | -2.747489000 | -0.447230000 |
| H | -1.990450000 | -3.399242000 | -0.498142000 |
| C | 0.846884000  | 1.858585000  | -0.147819000 |

|   |              |              |              |
|---|--------------|--------------|--------------|
| C | 2.033728000  | 1.853841000  | -0.892666000 |
| C | 2.971574000  | 2.868685000  | -0.753353000 |
| H | 3.881631000  | 2.850205000  | -1.344616000 |
| C | 2.748081000  | 3.902528000  | 0.150357000  |
| C | 1.581713000  | 3.919513000  | 0.908126000  |
| H | 1.407437000  | 4.719321000  | 1.620923000  |
| C | 0.638933000  | 2.910253000  | 0.755145000  |
| C | 2.276031000  | -1.683285000 | -0.070298000 |
| C | 2.747043000  | -0.866555000 | 0.949766000  |
| C | 4.117379000  | -0.715268000 | 1.112784000  |
| H | 4.491651000  | -0.074801000 | 1.903794000  |
| C | 5.001641000  | -1.384404000 | 0.274028000  |
| C | 4.515935000  | -2.206555000 | -0.737226000 |
| H | 5.203296000  | -2.725721000 | -1.396382000 |
| C | 3.147104000  | -2.355827000 | -0.919070000 |
| H | -0.262384000 | 2.925481000  | 1.361640000  |
| H | 3.483690000  | 4.692286000  | 0.266588000  |
| H | 2.228172000  | 1.046432000  | -1.592727000 |
| H | 2.047805000  | -0.360374000 | 1.605448000  |
| H | 6.071449000  | -1.265634000 | 0.408646000  |
| H | 2.755149000  | -2.973353000 | -1.720354000 |
| B | -2.913716000 | -0.653097000 | 1.244104000  |
| F | -1.828679000 | -0.516215000 | 2.121796000  |
| F | -3.434136000 | -1.956417000 | 1.308919000  |
| F | -3.891412000 | 0.293842000  | 1.517031000  |

## Int 2

|   |              |              |              |
|---|--------------|--------------|--------------|
| N | 1.992955000  | -0.322522000 | 0.178691000  |
| C | 2.303869000  | -1.220487000 | -0.775479000 |
| B | 0.500704000  | 0.175286000  | 0.190719000  |
| N | 0.368727000  | -0.687902000 | 2.612023000  |
| C | 3.596304000  | -1.718370000 | -0.843487000 |
| H | 3.847348000  | -2.437309000 | -1.614492000 |
| N | -1.573413000 | -0.718920000 | 1.565089000  |
| C | 4.544231000  | -1.289450000 | 0.074013000  |
| H | 5.558709000  | -1.671513000 | 0.032401000  |
| C | 4.185883000  | -0.363481000 | 1.047582000  |

|   |              |              |              |
|---|--------------|--------------|--------------|
| H | 4.898828000  | -0.006300000 | 1.779977000  |
| C | 2.890323000  | 0.107572000  | 1.074972000  |
| H | 2.538359000  | 0.827058000  | 1.802056000  |
| C | -0.236358000 | -0.431476000 | 1.463295000  |
| C | -1.803477000 | -1.192260000 | 2.835546000  |
| H | -2.788929000 | -1.492813000 | 3.155165000  |
| C | -0.592239000 | -1.154109000 | 3.468023000  |
| H | -0.363059000 | -1.437893000 | 4.485231000  |
| C | 0.397424000  | 1.741744000  | -0.054021000 |
| C | 0.209311000  | 2.618440000  | 1.019193000  |
| C | 0.156947000  | 3.995393000  | 0.825023000  |
| H | 0.008902000  | 4.657817000  | 1.672480000  |
| C | 0.283168000  | 4.520342000  | -0.456090000 |
| C | 0.467246000  | 3.663222000  | -1.536984000 |
| H | 0.561795000  | 4.067474000  | -2.540269000 |
| C | 0.529197000  | 2.289544000  | -1.334924000 |
| C | -2.557135000 | -0.614082000 | 0.541981000  |
| C | -3.207545000 | -1.762339000 | 0.103304000  |
| C | -4.161980000 | -1.665931000 | -0.900711000 |
| H | -4.666058000 | -2.561227000 | -1.249164000 |
| C | -4.455935000 | -0.431340000 | -1.470071000 |
| C | -3.798433000 | 0.710613000  | -1.027157000 |
| H | -4.023786000 | 1.676322000  | -1.467223000 |
| C | -2.852665000 | 0.625298000  | -0.013168000 |
| H | 0.666140000  | 1.633683000  | -2.190008000 |
| H | 0.235016000  | 5.593379000  | -0.613504000 |
| H | 0.092839000  | 2.216370000  | 2.022749000  |
| H | -2.945842000 | -2.722469000 | 0.534969000  |
| H | -5.194577000 | -0.360696000 | -2.261709000 |
| H | -2.339575000 | 1.510659000  | 0.343757000  |
| B | 1.068317000  | -1.580209000 | -1.726342000 |
| F | 0.002429000  | -0.553452000 | -1.070654000 |
| F | 0.514758000  | -2.812212000 | -1.565177000 |
| F | 1.167489000  | -1.182734000 | -3.025276000 |

## **6\_Ph**

|   |             |             |             |
|---|-------------|-------------|-------------|
| F | 0.121250000 | 0.464959000 | 2.027773000 |
|---|-------------|-------------|-------------|

|   |              |              |              |
|---|--------------|--------------|--------------|
| N | -1.856595000 | 0.744972000  | 0.689550000  |
| C | -2.841386000 | -0.035207000 | 0.200285000  |
| B | -0.301851000 | 0.371774000  | 0.674632000  |
| F | -2.866679000 | -1.332911000 | -1.911826000 |
| N | -1.103545000 | -1.896855000 | -0.392286000 |
| C | -4.159874000 | 0.412799000  | 0.298472000  |
| H | -4.946111000 | -0.220977000 | -0.094738000 |
| B | -2.582204000 | -1.456207000 | -0.536119000 |
| F | -3.404656000 | -2.450680000 | 0.017988000  |
| N | 1.018919000  | -1.808214000 | -0.023931000 |
| C | -4.455106000 | 1.628855000  | 0.884057000  |
| H | -5.481831000 | 1.972199000  | 0.956780000  |
| C | -3.413201000 | 2.408594000  | 1.378580000  |
| H | -3.589107000 | 3.369939000  | 1.845222000  |
| C | -2.129171000 | 1.934002000  | 1.262133000  |
| H | -1.271578000 | 2.488714000  | 1.621711000  |
| C | -0.142093000 | -1.134122000 | 0.125646000  |
| C | 0.773067000  | -3.016263000 | -0.647155000 |
| H | 1.564335000  | -3.719220000 | -0.848872000 |
| C | -0.562176000 | -3.065962000 | -0.875033000 |
| H | -1.169542000 | -3.830135000 | -1.331589000 |
| C | 0.490424000  | 1.396017000  | -0.276299000 |
| C | 0.150912000  | 1.545160000  | -1.625823000 |
| C | 0.864108000  | 2.398430000  | -2.459496000 |
| H | 0.582542000  | 2.498580000  | -3.503566000 |
| C | 1.940379000  | 3.123783000  | -1.955391000 |
| C | 2.292642000  | 2.989687000  | -0.617369000 |
| H | 3.133405000  | 3.549387000  | -0.218077000 |
| C | 1.573144000  | 2.132264000  | 0.210201000  |
| C | 2.318262000  | -1.317556000 | 0.310682000  |
| C | 2.672961000  | -1.141661000 | 1.640587000  |
| C | 3.935885000  | -0.646718000 | 1.941294000  |
| H | 4.219598000  | -0.499939000 | 2.977943000  |
| C | 4.829894000  | -0.341207000 | 0.921241000  |
| C | 4.463490000  | -0.528772000 | -0.407231000 |
| H | 5.154195000  | -0.280036000 | -1.205566000 |
| C | 3.201577000  | -1.016117000 | -0.718503000 |

|   |              |              |              |
|---|--------------|--------------|--------------|
| H | 1.961467000  | -1.376183000 | 2.422825000  |
| H | 2.886768000  | -1.137839000 | -1.749241000 |
| H | 5.813907000  | 0.047465000  | 1.161878000  |
| H | 1.862601000  | 2.020707000  | 1.250821000  |
| H | -0.684624000 | 0.982291000  | -2.037710000 |
| H | 2.501135000  | 3.789553000  | -2.604394000 |

## TS 1

|   |              |              |              |
|---|--------------|--------------|--------------|
| N | -1.607321000 | 0.781430000  | -0.621128000 |
| C | -2.200176000 | -0.495103000 | -0.696044000 |
| B | -0.166176000 | 0.720791000  | -0.440824000 |
| N | -1.165818000 | -1.387123000 | -0.651411000 |
| C | -3.505609000 | -0.673945000 | -1.198439000 |
| H | -3.876607000 | -1.680233000 | -1.355793000 |
| N | 0.970785000  | -1.793449000 | -0.383636000 |
| C | -4.284934000 | 0.426594000  | -1.408063000 |
| H | -5.310186000 | 0.320544000  | -1.740317000 |
| C | -3.730383000 | 1.722048000  | -1.177675000 |
| H | -4.334145000 | 2.610008000  | -1.321845000 |
| C | -2.436593000 | 1.871135000  | -0.803781000 |
| H | -1.966622000 | 2.837732000  | -0.679826000 |
| C | 0.053798000  | -0.767880000 | -0.478097000 |
| C | 0.312141000  | -2.996646000 | -0.534205000 |
| H | 0.836881000  | -3.936426000 | -0.480310000 |
| C | -1.011969000 | -2.762467000 | -0.701164000 |
| H | -1.835404000 | -3.445524000 | -0.818978000 |
| C | 0.764202000  | 1.948482000  | -0.237917000 |
| C | 1.980242000  | 2.064687000  | -0.927671000 |
| C | 2.827836000  | 3.147392000  | -0.726307000 |
| H | 3.762879000  | 3.210644000  | -1.274688000 |
| C | 2.480036000  | 4.148297000  | 0.174970000  |
| C | 1.280118000  | 4.055360000  | 0.873199000  |
| H | 1.004626000  | 4.827303000  | 1.585476000  |
| C | 0.436788000  | 2.969832000  | 0.667457000  |
| C | 2.345367000  | -1.647074000 | -0.106298000 |
| C | 2.772398000  | -0.659213000 | 0.777792000  |
| C | 4.127708000  | -0.517806000 | 1.042143000  |

|   |              |              |              |
|---|--------------|--------------|--------------|
| H | 4.454871000  | 0.256826000  | 1.727588000  |
| C | 5.056485000  | -1.362220000 | 0.444144000  |
| C | 4.621581000  | -2.350564000 | -0.433071000 |
| H | 5.338970000  | -3.008251000 | -0.912764000 |
| C | 3.270659000  | -2.490849000 | -0.719430000 |
| H | -0.485165000 | 2.902276000  | 1.239230000  |
| H | 3.140913000  | 4.994656000  | 0.334268000  |
| H | 2.267357000  | 1.292825000  | -1.635654000 |
| H | 2.046019000  | -0.013171000 | 1.255820000  |
| H | 6.114085000  | -1.249316000 | 0.657237000  |
| H | 2.935443000  | -3.238104000 | -1.430790000 |
| B | -2.835891000 | -0.830584000 | 1.614195000  |
| F | -1.618678000 | -0.576920000 | 2.083852000  |
| F | -3.218262000 | -2.103068000 | 1.485687000  |
| F | -3.765867000 | 0.111187000  | 1.718067000  |

## TS 2

|   |              |              |              |
|---|--------------|--------------|--------------|
| N | -1.850009000 | 0.808973000  | -0.460360000 |
| C | -2.589861000 | -0.304367000 | 0.011080000  |
| B | -0.475259000 | 0.643136000  | 0.180658000  |
| N | -1.420269000 | -1.511182000 | -0.366776000 |
| C | -3.874214000 | -0.524579000 | -0.642868000 |
| H | -4.595022000 | -1.181935000 | -0.170114000 |
| N | 0.701213000  | -1.881920000 | -0.239573000 |
| C | -4.129676000 | 0.084154000  | -1.824622000 |
| H | -5.078346000 | -0.089705000 | -2.324580000 |
| C | -3.195541000 | 0.996030000  | -2.407197000 |
| H | -3.394374000 | 1.472734000  | -3.358018000 |
| C | -2.089737000 | 1.329757000  | -1.691984000 |
| H | -1.365286000 | 2.061198000  | -2.035100000 |
| C | -0.244062000 | -0.922090000 | -0.193155000 |
| C | 0.082522000  | -3.103249000 | -0.441413000 |
| H | 0.648212000  | -4.018066000 | -0.519604000 |
| C | -1.258782000 | -2.860305000 | -0.496159000 |
| H | -2.082942000 | -3.541970000 | -0.634056000 |
| C | 0.618588000  | 1.756972000  | 0.022912000  |
| C | 1.568255000  | 1.696707000  | -1.002276000 |



|   |              |              |              |
|---|--------------|--------------|--------------|
| C | 2.518232000  | 2.698407000  | -1.165206000 |
| H | 3.247192000  | 2.630002000  | -1.966797000 |
| C | 2.539891000  | 3.781240000  | -0.292778000 |
| C | 1.604194000  | 3.859194000  | 0.733713000  |
| H | 1.616486000  | 4.703032000  | 1.416784000  |
| C | 0.650835000  | 2.858479000  | 0.884507000  |
| C | 2.100509000  | -1.679133000 | -0.072582000 |
| C | 2.554284000  | -0.904806000 | 0.987754000  |
| C | 3.917482000  | -0.685005000 | 1.129710000  |
| H | 4.275563000  | -0.073511000 | 1.950650000  |
| C | 4.816063000  | -1.247895000 | 0.230374000  |
| C | 4.350014000  | -2.030842000 | -0.820205000 |
| H | 5.047617000  | -2.466970000 | -1.527193000 |
| C | 2.986968000  | -2.244957000 | -0.981137000 |
| H | -0.077218000 | 2.929291000  | 1.687290000  |
| H | 3.284648000  | 4.562137000  | -0.411841000 |
| H | 1.573747000  | 0.848435000  | -1.682029000 |
| H | 1.845981000  | -0.479997000 | 1.689676000  |
| H | 5.880661000  | -1.075411000 | 0.347414000  |
| H | 2.610620000  | -2.829521000 | -1.814045000 |
| B | -2.458492000 | -0.257473000 | 1.620877000  |
| F | -0.949961000 | 0.494113000  | 1.670351000  |
| F | -2.266908000 | -1.417229000 | 2.302426000  |
| F | -3.265478000 | 0.632957000  | 2.249449000  |

### TS 3

|   |              |              |              |
|---|--------------|--------------|--------------|
| N | 1.965375000  | -0.372461000 | -0.374116000 |
| C | 1.980302000  | -1.707090000 | -0.578270000 |
| B | 0.509951000  | 0.349264000  | -0.226331000 |
| N | 0.545929000  | -0.820125000 | 2.093058000  |
| C | 3.187333000  | -2.381257000 | -0.683446000 |
| H | 3.188588000  | -3.453963000 | -0.842602000 |
| N | -1.483039000 | -0.652631000 | 1.241418000  |
| C | 4.383666000  | -1.681846000 | -0.576121000 |
| H | 5.331706000  | -2.203319000 | -0.651124000 |
| C | 4.342086000  | -0.314643000 | -0.367926000 |
| H | 5.244863000  | 0.276123000  | -0.274998000 |

|   |              |              |              |
|---|--------------|--------------|--------------|
| C | 3.108843000  | 0.306394000  | -0.270617000 |
| H | 3.009936000  | 1.371131000  | -0.101324000 |
| C | -0.146729000 | -0.390757000 | 1.045060000  |
| C | -1.616599000 | -1.273549000 | 2.460124000  |
| H | -2.581518000 | -1.569432000 | 2.840758000  |
| C | -0.350707000 | -1.359070000 | 2.970927000  |
| H | -0.043574000 | -1.783659000 | 3.916271000  |
| C | 0.673796000  | 1.935812000  | -0.061422000 |
| C | 0.928743000  | 2.533464000  | 1.178627000  |
| C | 1.058743000  | 3.912977000  | 1.304557000  |
| H | 1.254293000  | 4.353363000  | 2.277876000  |
| C | 0.927392000  | 4.729378000  | 0.185467000  |
| C | 0.666091000  | 4.156940000  | -1.055275000 |
| H | 0.554976000  | 4.788861000  | -1.931679000 |
| C | 0.542139000  | 2.775897000  | -1.172654000 |
| C | -2.565265000 | -0.340699000 | 0.376206000  |
| C | -3.440178000 | -1.349611000 | -0.012877000 |
| C | -4.507999000 | -1.046002000 | -0.847826000 |
| H | -5.188535000 | -1.833196000 | -1.155269000 |
| C | -4.693323000 | 0.255464000  | -1.301120000 |
| C | -3.810066000 | 1.256306000  | -0.910528000 |
| H | -3.948921000 | 2.273939000  | -1.260355000 |
| C | -2.748880000 | 0.964669000  | -0.064418000 |
| H | 0.326285000  | 2.336976000  | -2.142543000 |
| H | 1.021800000  | 5.806801000  | 0.281197000  |
| H | 1.023012000  | 1.903783000  | 2.060126000  |
| H | -3.269003000 | -2.366291000 | 0.325198000  |
| H | -5.523219000 | 0.488756000  | -1.960007000 |
| H | -2.060113000 | 1.739820000  | 0.251575000  |
| B | 0.647283000  | -2.544812000 | -0.713329000 |
| F | -0.152412000 | 0.008527000  | -1.435090000 |
| F | 0.240551000  | -3.329687000 | 0.269074000  |
| F | 0.040647000  | -2.693518000 | -1.874888000 |

## 6.) Supplementary References

- 1) Borys, Andryj M. "An Illustrated Guide to Schlenk Line Techniques." *Organometallics* 42.3 (2023): 182-196.
- 2) Nirmala, Muthukumar, and Periasamy Viswanathamurthi. "Ruthenium (II) complexes bearing pyridine-functionalized N-heterocyclic carbene ligands: Synthesis, structure and catalytic application over amide synthesis." *Journal of Chemical Sciences* 128 (2016): 1725-1735.
- 3) Kaufmann, Dieter. "Borylierung von Arylsilanen, I Ein allgemeiner, einfacher und selektiver Zugang zu Phenyl-dihalogenboranen." *Chemische Berichte* 120.5 (1987): 853-854.
- 4) Strong, Henry, et al. "Sodium Carbonyl Ferrates, Na<sub>2</sub> [Fe (Co)<sub>4</sub>], Na<sub>2</sub> [Fe<sub>2</sub> (Co)<sub>8</sub>], and Na<sub>2</sub> [Fe<sub>3</sub> (Co)<sub>11</sub>]. Bis [μ-Nitridobis (Triphenylphosphorus)(1+)] Undecacarbonyltriferrate (2-), [(Ph<sub>3</sub>P)<sub>2</sub>N]<sub>2</sub> [Fe<sub>3</sub> (Co)<sub>11</sub>]." *Inorganic Syntheses* (1986): 157-161.
- 5) *Organic Syntheses*, Coll. Vol. 9, p.95 (1998); Vol. 70, p.169 (1992).
- 6) Craig, Sarah M., et al. "Synthesis and characterization of Ni (0) complexes supported by an unsymmetric C, N ligand." *Journal of Coordination Chemistry* 75.11-14 (2022): 1841-1852.
- 7) Gaussian 16, Revision C.01, M. J. Frisch, G. W. Trucks, H. B. Schlegel, G. E. Scuseria, M. A. Robb, J. R. Cheeseman, G. Scalmani, V. Barone, G. A. Petersson, H. Nakatsuji, X. Li, M. Caricato, A. V. Marenich, J. Bloino, B. G. Janesko, R. Gomperts, B. Mennucci, H. P. Hratchian, J. V. Ortiz, A. F. Izmaylov, J. L. Sonnenberg, D. Williams-Young, F. Ding, F. Lipparini, F. Egidi, J. Goings, B. Peng, A. Petrone, T. Henderson, D. Ranasinghe, V. G. Zakrzewski, J. Gao, N. Rega, G. Zheng, W. Liang, M. Hada, M. Ehara, K. Toyota, R. Fukuda, J. Hasegawa, M. Ishida, T. Nakajima, Y. Honda, O. Kitao, H. Nakai, T. Vreven, K. Throssell, J. A. Montgomery, Jr., J. E. Peralta, F. Ogliaro, M. J. Bearpark, J. J. Heyd, E. N. Brothers, K. N. Kudin, V. N. Staroverov, T. A. Keith, R. Kobayashi, J. Normand, K. Raghavachari, A. P. Rendell, J. C. Burant, S. S. Iyengar, J. Tomasi, M. Cossi, J. M. Millam, M. Klene, C. Adamo, R. Cammi, J. W. Ochterski, R. L. Martin, K. Morokuma, O. Farkas, J. B. Foresman, and D. J. Fox, Gaussian, Inc., Wallingford CT, 2019.

- 8) Adamo, Carlo, and Vincenzo Barone. "Toward reliable density functional methods without adjustable parameters: The PBE0 model." *The Journal of chemical physics* 110.13 (1999): 6158-6170.
- 9) Grimme, Stefan, Stephan Ehrlich, and Lars Goerigk. "Effect of the damping function in dispersion corrected density functional theory." *Journal of computational chemistry* 32.7 (2011): 1456-1465.
- 10) Krishnan, R. B. J. S., et al. "Self-consistent molecular orbital methods. XX. A basis set for correlated wave functions." *The Journal of chemical physics* 72.1 (1980): 650-654.
- 11) Clark, Timothy, et al. "Efficient diffuse function-augmented basis sets for anion calculations. III. The 3-21+ G basis set for first-row elements, Li-F." *Journal of Computational Chemistry* 4.3 (1983): 294-301.
- 12) Marenich, Aleksandr V., Christopher J. Cramer, and Donald G. Truhlar. "Universal solvation model based on solute electron density and on a continuum model of the solvent defined by the bulk dielectric constant and atomic surface tensions." *The Journal of Physical Chemistry B* 113.18 (2009): 6378-6396.
- 13) Mayer, Istvan. "Charge, bond order and valence in the AB initio SCF theory." *Chemical Physics Letters* 97.3 (1983): 270-274.
- 14) Lu, Tian, and Feiwu Chen. "Multiwfn: A multifunctional wavefunction analyzer." *Journal of computational chemistry* 33.5 (2012): 580-592.
- 15) Chen, Zhongfang, et al. "Nucleus-independent chemical shifts (NICS) as an aromaticity criterion." *Chemical reviews* 105.10 (2005): 3842-3888. Geuenich, Daniel, et al. "Anisotropy of the induced current density (ACID), a general method to quantify and visualize electronic delocalization." *Chemical reviews* 105.10 (2005): 3758-3772.
- 16) Zhurko G. A. Chemcraft - graphical program for visualization of quantum chemistry computations. Ivanovo, Russia, 2005. <https://chemcraftprog.com>
